# Supplementary material for: Elder abuse as a risk factor for psychological distress among older adults in India: a cross-sectional study
Source: PubMed Central journal article supplement (PMC5665217; doi:10.1136/bmjopen-2017-017152), 2017-10-22
Supplement: bmjopen-2017-017152.draft_revisions.pdf [file bmjopen-2017-017152.draft_revisions.pdf]

# BMJ Open

BMJ Open is committed to open peer review. As part of this commitment we make the peer review history of every article we publish publicly available.

When an article is published we post the peer reviewers' comments and the authors' responses online. We also post the versions of the paper that were used during peer review. These are the versions that the peer review comments apply to.

The versions of the paper that follow are the versions that were submitted during the peer review process. They are not the versions of record or the final published versions. They should not be cited or distributed as the published version of this manuscript.

BMJ Open is an open access journal and the full, final, typeset and author-corrected version of record of the manuscript is available on our site with no access controls, subscription charges or pay-per-view fees (<http://bmjopen.bmj.com>).

If you have any questions on BMJ Open's open peer review process please email [editorial.bmjopen@bmj.com](mailto:editorial.bmjopen@bmj.com)

# BMJ Open

## Elder abuse as a risk factor for psychological distress among older adults in India: a cross-sectional study

|                                 |                                                                                                                                                                                                                                                                                            |
|---------------------------------|--------------------------------------------------------------------------------------------------------------------------------------------------------------------------------------------------------------------------------------------------------------------------------------------|
| Journal:                        | <i>BMJ Open</i>                                                                                                                                                                                                                                                                            |
| Manuscript ID                   | bmjopen-2017-017152                                                                                                                                                                                                                                                                        |
| Article Type:                   | Research                                                                                                                                                                                                                                                                                   |
| Date Submitted by the Author:   | 05-Apr-2017                                                                                                                                                                                                                                                                                |
| Complete List of Authors:       | Evandrou , Maria ; University of Southampton, Centre for Research on Ageing, ESRC Centre for Population Change<br>Falkingham, J; University of Southampton<br>Qin, Min; Centre for Research on Ageing, ESRC Centre for Population Change<br>Vlachantoni, Athina; University of Southampton |
| <b>Primary Subject Heading</b>: | Public health                                                                                                                                                                                                                                                                              |
| Secondary Subject Heading:      | Mental health                                                                                                                                                                                                                                                                              |
| Keywords:                       | Elder abuse, Risk factors, MENTAL HEALTH                                                                                                                                                                                                                                                   |
|                                 |                                                                                                                                                                                                                                                                                            |

SCHOLARONE™  
Manuscripts

1  
2  
3  
4 **Elder abuse as a risk factor for psychological distress**  
5  
6 **among older adults in India: a cross-sectional study**  
7  
8  
9

10  
11 Maria Evandrou<sup>1</sup>, Jane Falkingham<sup>1</sup>, Min Qin<sup>1</sup> and Athina Vlachantoni<sup>1</sup>  
12

13  
14 <sup>1</sup>Centre for Research on Ageing and ESRC Centre for Population Change, University of Southampton,  
15  
16 Southampton, SO17 1BJ, UK  
17  
18

19  
20  
21 Correspondence to

22  
23  
24 Dr. Min Qin

25  
26 Centre for Research on Ageing and ESRC Centre for Population Change

27  
28  
29 University of Southampton

30  
31 Southampton, SO17 1BJ

32  
33  
34 UK

35  
36 Tel +44 (0)23 80 594290

37  
38  
39 Fax +44 (0)23 80 594290

40  
41 Email: [min.qin@soton.ac.uk](mailto:min.qin@soton.ac.uk)  
42  
43  
44  
45  
46  
47  
48

49 Word count 4541  
50  
51  
52  
53  
54  
55  
56  
57  
58  
59  
60

**Abstract**

**Objectives** This study examines the association between elder abuse and psychological distress among older adults in India, and explores whether this association varies by the level of psychosocial and material resources.

**Methods** Bi-variate and multivariate analyses were conducted using data on a representative sample of 9,692 adults aged 60 and above in seven Indian states from the UNFPA project 'Building Knowledge Base on Ageing in India (BKPAI)'. Any reported elder abuse (physical and/or emotional) from family members one month before the survey was examined.

**Results** The results show that the experience of abuse is negatively associated with the mental health of older adults, and this relationship persists even after controlling for demographic and socio-economic factors. The findings also suggest that household wealth has an inverse relationship with mental health, with the association between experiencing elder abuse and reporting poor mental health being strongest amongst older people in wealthy households.

**Conclusions** Elder abuse in India is currently a neglected phenomenon, and greater recognition of the link between abuse and mental health is critical in order to improve the well-being of vulnerable older adults, some of whom may be 'hidden' within well-off households.

**Key Words:** Elder abuse—Risk factors—Mental health

**Strengths and limitations of this study**

- The findings of the study are from a large representative sample of 9692 older adults from selected Indian states.
- Abuse data in this study were self-reported and there was no validation by agencies charged with investigating elder abuse.
- It is possible that older people already had stress before the experience of abuse, and at the time of the interview were more likely than others to recall past experiences such as abuse.

er review only

## Introduction

India's population is ageing. With improvements in mortality as a result of rising living standards, improved sanitation, public health and medical advances, more people are living longer and surviving into old age. Such trends, combined with recent falls in fertility, mean that the number of older people is both increasing in absolute terms and also as a share of the population. In 1980, individuals aged 60 and over accounted for just 5.9 percent of the Indian population; by 2015 this had risen to 8.9 percent, comprising 116.5 million people, and by 2050 older people are projected to constitute nearly one fifth (19.4%) of the total population, with 330 million Indians in their sixties or older. <sup>1</sup> The changes in the age structure of India's population are being accompanied by other social and economic transformations including rapid urbanization and industrialization. Increasing women's participation in paid employment, greater internal and international mobility amongst the younger generation and the growth of individualism are all impacting upon the traditional Indian family system; a system which has emphasized the obligation of sons and their wives to respect, obey, and provide care for their aged parents. <sup>2</sup>

Traditionally, elders have been respected in Indian society, and families are the principal financial, emotional and physical caregivers for older relatives. <sup>3</sup> Although this tradition remains today, <sup>4</sup> qualitative studies have demonstrated that both respect for older people and the caring traditions of the extended family are on the wane in the larger context of societal and cultural changes. Older people are more likely to be exposed to abuse, isolation and abandonment. <sup>5-6</sup> Elder abuse is internationally defined as a "single, or repeated act, or lack of appropriate action, occurring within any relationship where there is an expectation of trust

1  
2  
3 which causes harm or distress to an older person".<sup>7</sup> Elder abuse can manifest as physical,  
4  
5 emotional, sexual, and financial abuse, and/or as intentional or unintentional neglect.  
6  
7  
8 Qualitative research has found that selected later life mental disorders may be attributed to  
9  
10 abuse, neglect, or a lack of love from children.<sup>5</sup> However, psychological distress in later life  
11  
12 remains an under-researched area in India, particularly in terms of the psychological  
13  
14 consequences associated with elder abuse and neglect.<sup>8-9</sup> This study aims to contribute to the  
15  
16 literature by investigating the association between elder abuse and psychological distress  
17  
18 among older adults in India and examining whether this association varies by the level of  
19  
20 psychosocial and material resources at older adults' disposal.  
21  
22  
23  
24  
25  
26  
27  
28  
29

### 30 **The relationship between elder abuse, resources and psychological distress**

31  
32  
33 Psychological distress comprises of a variety of symptoms such as depression, anxiety, stress  
34  
35 and insomnia. The level of such distress experienced by an individual at any point in time is  
36  
37 determined by various biological and psychosocial factors.<sup>10-11</sup> Elder abuse is a stressful  
38  
39 experience which has been found to have harmful effects on mental health,<sup>12</sup> with depression,  
40  
41 anxiety and post-traumatic disorder being reported as the most prevalent psychological  
42  
43 consequences.<sup>13-14</sup>  
44  
45  
46  
47  
48

49  
50 The general stress theory postulates that the effect of stressors (i.e. stressful events) on  
51  
52 psychological health operates in three phases: alarm, resistance, and exhaustion, and is a  
53  
54 process that involves changes in individuals' immune system, endocrine system and  
55  
56 cardiovascular reactivity.<sup>15</sup> When problems accumulate, persist and strain individuals, then  
57  
58  
59  
60

1  
2  
3  
4 adaptation resources are depleted and a stimulated parasympathetic system may lead to  
5  
6 worrying, anxiety, depression, anger and/or other physical illness. Studies have found that  
7  
8 older adults who are mistreated have higher levels of psychological distress than those who  
9  
10 have no such experience.<sup>16-17</sup> The frequency or type of elder abuse also has an impact on  
11  
12 mental health. Fisher and Regan (2006)<sup>18</sup> found that repeated abuse or multiple types of elder  
13  
14 abuse (e.g. emotional) were risk factors for depression or anxiety among older women. Based  
15  
16 on previous empirical findings, this paper hypothesizes (H1) *that older adults who report*  
17  
18 *experiencing elder abuse will have higher odds of psychological distress than those who do*  
19  
20 *not report such experiences.*  
21  
22  
23  
24  
25

26  
27 However, many individuals who experience stressful events do not go on to develop a  
28  
29 psychological illness. The stress-buffering model suggests that psychosocial resources  
30  
31 moderate the deleterious effects of high levels of stress. The statistical interaction between  
32  
33 stress and resources can be used to test these moderating effects.<sup>19</sup> Resources may intervene  
34  
35 between the experience of stress and the onset of mental illness by providing a solution to the  
36  
37 problem or reducing the perceived importance of the problem, which in turn helps to decrease  
38  
39 or eliminate the stress reaction. Psychosocial resources that can buffer the negative impact of  
40  
41 life events on psychological well-being include subjective resources such as high self-esteem,  
42  
43 mastery, social support and social participation, and objective resources such as  
44  
45 socioeconomic status, including income and household wealth.<sup>20-22</sup> For instance, a beneficial  
46  
47 effect of social support on one's mental health could occur thanks to large social networks  
48  
49 providing individuals with regular positive experiences and stable, socially-rewarding roles in  
50  
51 the community. This kind of support could provide a positive effect, a sense of predictability  
52  
53  
54  
55  
56  
57  
58  
59  
60



1  
2  
3 and stability in one's life situation, and recognition of self-worth, all of which are related to  
4 overall well-being. At the same time, material resources such as income and household  
5 wealth can offer protection against negative experiences associated with economic problems.  
6  
7  
8  
9  
10  
11 Indeed, previous empirical studies have found that in the presence of stress from elder abuse,  
12 supportive relationships may buffer the effect of stress.<sup>23,17</sup> As such, this paper hypothesizes  
13 that (H2) *the negative association of elder abuse with psychological distress will be stronger*  
14 *for those with fewer psychosocial and material resources than for those with more*  
15 *psychosocial and material resources.*  
16  
17  
18  
19  
20  
21  
22  
23  
24  
25  
26  
27

## 28 **Data and methods**

29  
30  
31 This study analyses data collected as part of the UNFPA 'Building Knowledge Base on  
32 Ageing in India (BKPAI)' project. The BKPAI Survey was conducted in 2011 in seven major  
33 demographically advanced states of India - Himachal Pradesh, Punjab, West Bengal, Odisha,  
34 Maharashtra, Kerala and Tamil Nadu. A representative sample was obtained using a random  
35 sampling method covering the Northern, Southern, Western and Eastern regions. The detailed  
36 information about the survey sampling is described in a previous report.<sup>24</sup> The primary  
37 sampling units were households. All those aged 60 and above in the sampled households  
38 were interviewed face-to-face. The completion rate for households was 94.7 percent and 92.9  
39 percent for elderly respondents. Non-response at both the household and individual levels  
40 was adjusted through the sampling weights calculation by the research organisation. The  
41 BKPAI survey data includes information on older people's mental and physical health, their  
42  
43  
44  
45  
46  
47  
48  
49  
50  
51  
52  
53  
54  
55  
56  
57  
58  
59  
60

1  
2  
3  
4 living arrangements, socio-economic circumstances, including employment status and  
5  
6 household assets, as well as information on intergenerational exchanges within the family and  
7  
8 participation in social activities. The total sample size interviewed is 9,692. Of these, 103 are  
9  
10 excluded because of missing values (missingness is not mutually exclusive) on psychological  
11  
12 distress (N=36); education (N=53); whether has someone for trust/confidence (N=7); and  
13  
14 whether feels able to manage unexpected situations (N=16). The final analytical sample is  
15  
16  
17  
18  
19 9,589 adults aged 60 and above.

## 20 21 22 23 24 25 **Measurements**

### 26 27 28 **Psychological distress**

29  
30  
31  
32 The 12-item version of the General Health Questionnaire (GHQ-12) is used as a measure of  
33  
34 psychological distress. These questions have been widely used to identify minor psychiatric  
35  
36 disorders in the general population.<sup>25</sup> The GHQ-12 has been previously validated in India in  
37  
38 clinical surveys conducted in Kannada,<sup>26-27</sup> Hindi<sup>28</sup> and Tamil.<sup>29</sup> Given that the BKPAI  
39  
40 study was conducted across multiple states with different languages and focused amongst  
41  
42 older adults, it was important for the team to test the reliability of GHQ-12 within the BKPAI.  
43  
44  
45 The measure was found to have high internal consistency with an overall Cronbach's alpha of  
46  
47 0.9. Examining each state individually, Cronbach's alpha ranged from a low of 0.7 in West  
48  
49 Bengal to a high of 0.94 in Himachal Pradesh, suggesting that the measure may be considered  
50  
51  
52  
53  
54  
55  
56  
57  
58  
59  
60 to be valid across all seven states and in all the languages used.

1  
2  
3  
4 Using the standard GHQ scoring method, the four category responses for each of the 12  
5  
6 questions are coded (0, 0, 1, 1), with the points summed to produce a total score ranging from  
7  
8 0-12. We used a score of  $\geq 4$  as the threshold to define psychological distress according to  
9  
10 studies validating the GHQ-12 against standardized psychiatric interviews.<sup>30,27</sup>  
11  
12  
13

### 14 15 16 17 18 **Elder abuse**

19  
20  
21 In the BKPAI survey, the respondents were asked two sets of questions regarding their  
22  
23 experience of abuse since they were 60 years old and in the last month. The first question was  
24  
25 *'In the time since you completed 60 years of age have you faced any type of abuse or violence*  
26  
27 *or neglect or disrespect by any person?'* If the respondent answered 'Yes', a follow-up  
28  
29 questions asked the type of abuse (Physical abuse, Verbal abuse, Economic abuse, Showing  
30  
31 disrespect, Neglect and Other) and where it originated (within family, outside family, both  
32  
33 within family & outside family). *A further question asked 'Have you faced any type of*  
34  
35 *physical or emotional abuse or violence in the last month?'* The responses include *'1. No, 2.*  
36  
37 *Physical, 3. Emotional, 4. Both physical and emotional'*. All other types of violence other  
38  
39 than physical were merged into emotional violence. If the respondent answered in the  
40  
41 affirmative, follow-up questions elicited the source of abuse which could include *'1. Spouse,*  
42  
43 *2. Son, 3. Daughter, 4. Son-in-law, 5. Daughter-in-law, 6. Domestic helper, 7. Grandchildren,*  
44  
45 *8. Relatives, 9. Neighbours, 10. Other'*. Careful attention was paid to avoid the appearance of  
46  
47 any family members during this particular part of data collection and to guarantee the  
48  
49 confidentiality of information.<sup>24</sup>  
50  
51  
52  
53  
54  
55  
56  
57  
58  
59  
60

1  
2  
3  
4 A previous study based on this data reported that 11 per cent of respondents have experienced  
5  
6 at least one type of abuse *after the age of 60*. Verbal abuse is most frequently claimed,  
7  
8 followed by disrespect, economic abuse, neglect and physical abuse, with the most common  
9  
10 perpetrator being the respondent's son.<sup>9</sup> In this study we concentrate on older adults who  
11  
12 report having experienced physical and/or emotional abuse in *the last month*, distinguishing  
13  
14 between those who report abuse by family members and others, to examine the  
15  
16 contemporaneous interaction between elder abuse, psychosocial and material resources, and  
17  
18 psychological distress. Here, abuse is limited to that reported as emanating from family  
19  
20 members as it is this form of abuse that we hypothesise may have increased as a result of  
21  
22 recent changes impacting the traditional Indian family system.  
23  
24  
25  
26  
27  
28  
29  
30  
31  
32

### 33 **Psychosocial and material resources**

34  
35  
36 An individual's psychosocial resources include personal qualities such as optimism,  
37  
38 psychological control or mastery, and self-esteem, as well as the availability of social support,  
39  
40 all of which can help to manage stressful events and contribute to better health outcomes.  
41  
42

43  
44 <sup>31,20,22</sup> There are a variety of scales measuring social support and personal coping resources.

45  
46 <sup>32-33</sup> The BKPAI was not explicitly designed to measure psychosocial resources. It does,  
47  
48 however, contain a number of important indicators of potential support and coping resources,  
49  
50 including being married or living together with one's partner, participation in social activities,  
51  
52 having someone to trust and confide in, and feeling able to manage unexpected situations.  
53  
54  
55  
56  
57  
58  
59  
60

1  
2  
3  
4 *Participation in social activities* is defined as having participated in any of the five listed  
5  
6 activities in the last 12 months: attending a public meeting with discussion of local,  
7  
8 community or political affairs; attending any group, club, society, union or organizational  
9  
10 meeting; working with other people in your neighbourhood to fix or improve something;  
11  
12 attending or participating in any religious programs/services (not including weddings and  
13  
14 funerals); going out of the house to visit friends or relatives.  
15  
16

17  
18  
19 The question on *feeling able to manage unexpected situations* has three response categories:  
20  
21 most of the time, sometimes, and hardly ever feeling that one can manage situations even  
22  
23 when they do not turn out to be as expected.  
24  
25

26  
27  
28 *Material resources* include personal sources of income (no income, one source, multiple  
29  
30 sources) and household wealth quintile. Household wealth quintile is computed using  
31  
32 principle component analysis (PCA) based on 30 assets and housing characteristics:  
33  
34 household electrification; drinking water source; type of toilet facility; type of house; cooking  
35  
36 fuel; house ownership; ownership of a bank or post-office account; and ownership of a  
37  
38 mattress, pressure cooker, chair, cot/bed, table, electric fan, radio/transistor, black and white  
39  
40 television, colour television, sewing machine, mobile telephone, any landline phone,  
41  
42 computer, internet facility; refrigerator, watch or clock, bicycle, motorcycle or scooter,  
43  
44 animal-drawn cart, car, water pump, thresher and tractor. This measure was found to provide  
45  
46 a good socio-economic gradient of health outcomes among older adults in the survey.<sup>24</sup>  
47  
48  
49  
50  
51  
52  
53  
54  
55  
56

### 57 **Other control variables**

58  
59  
60

1  
2  
3  
4  
5  
6  
7  
8  
9  
10  
11  
12  
13  
14  
15  
16  
17  
18  
19  
20  
21  
22  
23  
24  
25  
26  
27  
28  
29  
30  
31  
32  
33  
34  
35  
36  
37  
38  
39  
40  
41  
42  
43  
44  
45  
46  
47  
48  
49  
50  
51  
52  
53  
54  
55  
56  
57  
58  
59  
60

Covariates include the individual's age group, sex, education, caste, working status, living arrangement, self-reported health, chronic disease, health-related limitations to daily activities, disability and geographic factors (rural/ urban residence, and state). An individual's difficulty with Activities of Daily Living (ADL) is computed based on the level of independence reported by the older person in carrying out the activities of feeding, bathing, dressing, toilet, mobility and continence. Each question has three response categories: 'Do not require assistance; Require partial assistance; Require full assistance'. These are scored as 0, 1 or 2 respectively and are then summed across the six questions, resulting in a total score ranging between 0-12. Given the unequal intervals between the score, rather treating it as a continuous variable, we group it into an ordered categorical variable. Older respondents are defined as having 'no need for assistance' if the total score is 0, as having a 'light need for assistance' if the total score is between 1-5, and as having a 'heavy need for assistance' if the total score is  $\geq 6$ .

Disability is computed based on the respondents' level of reported ability to see, hear, walk, chew, speak and remember. Each question has three response categories 'Yes fully, Yes partially, No'. These are scored as 0, 1 or 2 respectively and are then summed across the six questions, resulting in a total score of 0-12. Again, because of the unequal intervals between the score, we group the total score into an ordered categorical variable. Older people are defined as having 'no disability' if the total score is 0, 'light disability' if the total score is between 1-2, 'medium disability' with a score of 3-4, and 'high disability' if the total score is  $\geq 5$ .

## Method

A series of logistic regression models are estimated with the dependent variable being the report of psychological distress ( $\text{GHQ} \geq 4$  contrast to  $\text{GHQ} \leq 3$ ). The first model estimates the bivariate association between elder abuse and psychological distress. The second model adds the measures of psychosocial and material resources and other control variables to estimate the association of elder abuse and psychosocial and material resources, with psychological distress after controlling for other covariates. The final model includes the interaction terms of elder abuse with psychosocial and material resources variables to the main-effects-only model to examine whether psychosocial and material resources buffer the association between elder abuse and psychological distress.

## Results

### Descriptive findings

Table 1 presents descriptive statistics for the total analytical sample. The overall prevalence of psychological distress amongst persons aged 60 and over living in the seven Indian States is 40.6 per cent. Around 5 per cent of older adults had experienced some form of physical or emotional abuse or violence in the last month. Among this sub-group, the prevalence of psychological distress is much higher than in the general older population, at 61.6 per cent.

The indicators of psychosocial resources and socio-economic status appear to have an inverse relationship with psychological distress, with those older people living in households in the

1  
2  
3  
4 highest wealth quintile having a prevalence rate of 21.4 per cent compared to 64.1 per cent  
5  
6 amongst those living in households in the lowest wealth quintile. Similarly, those who  
7  
8 participated in social activities in the last month are less likely to experience psychological  
9  
10 distress than those who did not (37 v. 55.8 per cent respectively).  
11  
12  
13

14  
15  
16 Indicators of health status including self-related health, difficulty with ADLs and disability  
17  
18 all show a positive association with psychological distress. Older people living with their  
19  
20 spouse only experience the lowest prevalence of psychological distress (34.9 per cent), while  
21  
22 those living alone show the highest prevalence (50.9 per cent). Levels of psychological  
23  
24 distress increase with age and are higher among older women (44.7 per cent) than older men  
25  
26 (36.2 per cent). One's place of residence seems to play an important role with elders living in  
27  
28 urban areas having a lower level of psychological distress than their rural counterparts (35.1 v.  
29  
30 45.7 per cent). There are also considerable inter-state variations in the prevalence of  
31  
32 psychological distress. A relatively low level of psychological distress is found among older  
33  
34 adults in Punjab (20.8 per cent) and Himachal Pradesh (23.5 per cent), contrasting with much  
35  
36 higher levels in West Bengal (60.5 per cent) and Odisha (55.5 per cent).  
37  
38  
39  
40  
41  
42  
43  
44  
45  
46

#### 47 **Multivariate analysis results**

48  
49 Table 2 shows the odds ratios from the logistic regression models. Model 1 shows the simple  
50  
51 bi-variate relationships between elder abuse and psychological distress. The odds ratio of  
52  
53 2.44 suggests that older adults who experienced abuse during last month are more than twice  
54  
55 as likely to report psychological distress than those with no such experience. This effect is  
56  
57  
58  
59  
60



1  
2  
3  
4 attenuated once psychosocial resources and other control variables are added (Model 2).  
5  
6 Social activity participation, social support (having someone to trust) and mastery (feeling  
7  
8 able to manage situations) are all associated with psychological distress in the expected  
9  
10 direction. The exception is marital status, with the results indicating that older people who are  
11  
12 currently married or living together with partners are more likely to have psychological  
13  
14 distress than those who are widowed, although this finding is not statistically significant.  
15  
16 Finally, Model 3 presents interactions between the experience of elder abuse and  
17  
18 psychosocial factors (trust and mastery) and material resources (education and wealth  
19  
20 quintile). The inclusion of interactions adds significant explanatory value to the model with a  
21  
22 likelihood ratio test p-value of 0.008. The results indicate that psychosocial resources only  
23  
24 have a direct association with psychological distress; the interaction terms between elder  
25  
26 abuse and psychosocial resources variables are not statistically significant. Interestingly,  
27  
28 however, positive and significant interactions are observed between the experience of elder  
29  
30 abuse and the respondents' household wealth quintile.  
31  
32  
33  
34  
35  
36  
37  
38  
39

40 Figure 2 shows the predicted probabilities for  $\text{GHQ-12} \geq 4$  at each household wealth quintile  
41  
42 according to elder abuse experience, based on the coefficients from Model 3. The chart shows  
43  
44 that for those who did not experience elder abuse experience in the last month, the probability  
45  
46 of psychological distress decreases with the increase of household wealth. However, amongst  
47  
48 those who had experienced abuse, the opposite is found, with the probability of psychological  
49  
50 distress increasing as household wealth rises.  
51  
52  
53  
54  
55  
56  
57  
58  
59  
60

## Discussion and conclusion

The analyses in this paper suggest that elder abuse has a significant association with the mental health of older Indians. The results support the first hypothesis outlined in this paper. Elder abuse may be thought of as a particularly stressful event in later life. Typically Indian parents have continued to invest in their children into adulthood and traditionally have expected to be cared for at an older age. If their investment is not reciprocated, their life is likely to be coloured by a sense of injustice and exploitation,<sup>12</sup> which may lead to certain negative effects such as anger, depressed mood and loneliness.<sup>34</sup> Constant negative effects are known to be compromising to both physical and mental health, with the mechanism of pathogenesis operating through physiological changes, including one's immune suppression, and cardiovascular and endocrine reactivity.<sup>15,35</sup> Our results are consistent with other empirical studies, suggesting that there is a harmful link between elder abuse and psychological health.<sup>23,36,16,17</sup> However, no evidence is found for buffering effects of psychosocial resources, such as social support and perceived ability to control outcomes. The results only highlight a direct and beneficial association between psychosocial resources and psychological health, irrespective of the presence of elder abuse. One possible explanation is that elder abuse is in direct conflict with Indian cultural values, and thus older adults who have been abused may not disclose this information or seek support due to a sense of shame and/or a fear of stigmatization.<sup>37-38</sup> Another explanation may lie in the scale of the outcome variable. In this study, we focus on psychological distress using a nominal scale measurement. Previous studies that have demonstrated the buffering effects of psychosocial resources have measured psychological distress as a ratio scale<sup>23,17</sup> and thus it is possible that by using a

1  
2  
3  
4 nominal scale we may be missing some of the nuances around buffering effects. Interestingly  
5  
6 the results in this paper show that household wealth has a direct and inverse relationship with  
7  
8 psychological distress, and also offers a substantial link with the relationship between elder  
9  
10 abuse and psychological distress. Both qualitative and quantitative studies have found that  
11  
12 individuals who have financial or physical assets may feel more in control of their lives,  
13  
14 leading to less vulnerability to anxiety or mood disorders, or less severe psychological  
15  
16 symptoms.<sup>8,39</sup> Unexpectedly, however, we found that the negative association between elder  
17  
18 abuse and mental health is significantly stronger among older people living in wealthier  
19  
20 households. One possible explanation might be that issues of control over property, finance,  
21  
22 and other decisions may result in more family conflict between parents and their adult  
23  
24 children or other relatives among wealthier households than in poorer households. This is  
25  
26 consistent with qualitative studies in India which have highlighted bitter battles in village  
27  
28 families between elders and adult children over land and money.<sup>8,6</sup> Adult children have been  
29  
30 reported at times to resent the expense of medical care and treatments for their aged parents,  
31  
32 especially when some of the children felt they were providing more than their fair share of  
33  
34 the total cost. Again this may be more commonplace amongst wealthier households, where  
35  
36 private medical care is an option. Our findings reinforce previous research demonstrating the  
37  
38 role of socio-economic circumstances in determining older people's mental health. Poor  
39  
40 social and economic circumstances affect individuals' health throughout life.<sup>40-42</sup> The results  
41  
42 also add to the evidence base with regard to inequalities in older people's mental health  
43  
44 related to levels of physical health<sup>43-46</sup> and different geographic areas, reflecting differences  
45  
46  
47  
48  
49  
50  
51  
52  
53  
54  
55  
56  
57  
58  
59  
60

1  
2  
3  
4 in their social, political, economic arrangements and levels of public health services and  
5  
6 social protection.<sup>47</sup>  
7  
8

9  
10 In conclusion, the findings presented in this paper demonstrate that 1) in the seven Indian  
11  
12 states represented in this research, elder abuse shows a negative association with the mental  
13  
14 health of older adults; 2) household wealth generally has an inverse relationship with mental  
15  
16 health; 3) however, the negative association between elder abuse and mental health is  
17  
18 stronger among older people living in wealthy households.  
19  
20  
21

22  
23 The present study is limited by the cross-sectional design of the data. It is possible that older  
24  
25 people already had stress before the experience of abuse, and at the time of the interview  
26  
27 were more likely than others to recall past experiences such as abuse. The results could  
28  
29 benefit from repeated measures of psychological distress before and after abusive exposures.  
30  
31

32  
33 Another limitation is the self-report nature of the data. There is no validation by agencies  
34  
35 charged with investigating elder abuse. Due to social taboo, elder abuse might be  
36  
37 underreported, which may bias our results on the relationship between abuse and distress.  
38  
39

40  
41 Our data also lack purposively designed scales measuring social support and personal coping  
42  
43 resources. Future research addressing these issues will improve our understanding of the  
44  
45 relationship between elder abuse, psychosocial resources, and psychological distress.  
46  
47

48  
49 The number of older people in India is steadily growing.<sup>4</sup> Increased life expectancy brings  
50  
51 with it more chronic health problems and functional limitations that require long-term care.  
52  
53 Most older people continue to live in villages and to experience poor socioeconomic status  
54  
55 and are dependent upon their families for both financial and physical support. While the need  
56  
57  
58  
59  
60

1  
2  
3  
4 for care has grown, available resources have decreased. The lack of jobs close to where they  
5  
6 live forces many young Indians to seek employment in urban areas. Such migration reduces  
7  
8 the number of available caregivers and increases the demands on non-migrant family  
9  
10 members to shoulder responsibility for elders' care. The costs of care were often high, due to  
11  
12 a lack of adequate public health care for older persons. Mistreatment of one's older parents  
13  
14 may also emanate from conflict over the control of family property. Researchers have begun  
15  
16 to argue that traditional Indian cultural values and the consequences of urbanization and  
17  
18 modernization influence the nature and scope of elder abuse.<sup>38</sup> In addition, recent research  
19  
20 has highlighted the increasing incidence of elder abuse due to property separation/division,  
21  
22 living conditions and the growing generation differences in thinking and attitude towards  
23  
24 expectations and lifestyles.<sup>48</sup> As India continues on its path of economic development, with  
25  
26 increasing urbanisation and spatial mobility, older people may be further exposed to abuse.  
27  
28  
29  
30  
31  
32

33  
34 At present, mental health in later life is not a priority area in many low income countries<sup>49</sup>  
35  
36 and how it is associated with elder abuse is neglected in both the research and policy arenas.  
37  
38 Intergenerational relations between older people and their adult children are pivotal in the  
39  
40 health and wellbeing of older people. However, such relations can have both positive and  
41  
42 negative impacts upon the mental wellbeing of both the older person and, in certain cases,  
43  
44 that of the adult child carer.<sup>50-51</sup> Elder abuse needs to be recognised as a key public health  
45  
46 issue, and appropriate strategies, policies and practices put in place. Reducing elder abuse  
47  
48 will have a positive impact on both the physical and mental health outcomes in later life.  
49  
50  
51  
52  
53  
54  
55 Policy makers in India are faced with a major challenge in a low resource context, however  
56  
57  
58  
59  
60

1  
2  
3 widening the public policy debate to include the recognition of the prevalence of elder abuse  
4  
5  
6 and how best to address it within health policy planning would be a key move forward.  
7  
8  
9

10  
11 **Contributors** All authors Maria Evandrou, Jane Falkingham, Min Qin and Athina  
12 Vlachantoni contributed to conceptualising, writing, editing this paper, and have read and  
13 approved the final manuscript. Data analysis was performed by Min Qin.  
14  
15

16  
17 **Funding** The study was supported under the NWO-ESRC-ICSSR AgeGlobe Network  
18 (Indian-European research networking: ageing and well-being in a globalising world; grant  
19 number ES/K005979/1).  
20

21 **Competing interests** None declared.  
22

23  
24 **Ethics approval** Ethical approval for this study has been obtained from the Ethics  
25 Committee in the University of Southampton. The ethics clearance for the original study was  
26 obtained by the UNFPA.  
27

28  
29 **Data sharing statement** No additional data are available.  
30  
31  
32  
33  
34  
35  
36  
37  
38  
39  
40  
41  
42  
43  
44  
45  
46  
47  
48  
49  
50  
51  
52  
53  
54  
55  
56  
57  
58  
59  
60

## References

- 1 United Nations (UN). *World Population Prospects 2015*. New York: UN Department of Economic & Social Affairs, Population Division, 2015.
- 2 Dhillon P, Ladusingh L, Agrawal G, Ageing and changing patterns in familial structure for older persons in India: a decomposition analysis. *Quality in Ageing and Older Adults* 2016; 17: 83 – 96. doi: 10.1108/QAOA-10-2014-0024
- 3 Venkoba RA. Psychiatry of old age in India. *International Review of Psychiatry* 1993; 5: 165–170.
- 4 Government of India. *Situation Analysis of the Elderly in India*. Central Statistics Office, Ministry of Statistics & Programme Implementation, 2011.  
[http://mospi.nic.in/mospi\\_new/upload/elderly\\_in\\_india.pdf](http://mospi.nic.in/mospi_new/upload/elderly_in_india.pdf) (accessed 14 Oct 2016)
- 5 Patel V, Prince M. Ageing and mental health in developing countries: who cares? Qualitative studies from Goa, India. *Psychological Medicine* 2001; 31: 29–38. PMID: 11200957
- 6 Srivastava S, Bhatia MS, Rajoura OP, *et al*. Elder neglect in changing Indian scenario. *Delhi Psychiatry Journal* 2013; 16: 273–276.  
<http://medind.nic.in/daa/t13/i2/daat13i2p273.pdf>(accessed 17 Oct 2016)
- 7 WHO. *A Global Response to Elder Abuse and Neglect: Building Primary Health Care Capacity to Deal with the Problem Worldwide: Main Report* (pp.1). Geneva: WHO, 2008.
- 8 Soneja S. *Elder Abuse in India* Country Report for World Health Organization.1999.  
[http://www.who.int/ageing/projects/elder\\_abuse/alc\\_ea\\_ind.pdf](http://www.who.int/ageing/projects/elder_abuse/alc_ea_ind.pdf) (accessed 17 Oct

- 1  
2  
3  
4 2016)
- 5  
6 9 Skirbekk V, James KS. Abuse against elderly in India – the role of education. *BMC Public*  
7  
8 *Health* 2014; 14: 336. <http://www.biomedcentral.com/1471-2458/14/336>. (accessed  
9  
10 14 Oct 2016)
- 11  
12  
13 10 Ohayashi H, Yamada S. *Psychological Distress Symptoms, Causes and Coping*. New  
14  
15 York: Nova Science Publishers, Inc. 2012
- 16  
17  
18 11 Tyrer P, Steinberg D. *Models for Mental Disorder*. Chichester: John Wiley and Sons.  
19  
20  
21 2013.
- 22  
23  
24 12 Winterstein T, Eisikovits Z. The experience of loneliness of battered old women. *Journal*  
25  
26 *of Women & Aging* 2005; 17: 3–19. doi:10.1300/J074v17n04\_02
- 27  
28  
29 13 Dyer CB, Pavlik VN, Murphy KP, *et al.* The high prevalence of depression and dementia  
30  
31 in elder abuse or neglect. *JAGS* 2000; 48: 205-208. PMID: 10682951
- 32  
33  
34 14 Begle AM, Strachan M, Cisler JM, *et al.* Elder mistreatment and emotional symptoms  
35  
36 among older adults in a largely rural population: the South Carolina elder  
37  
38 mistreatment study. *Journal of Interpersonal Violence* 2011; 26: 2321–2332. doi:  
39  
40 10.1177/0886260510383037
- 41  
42  
43 15 Selye H. Stress and disease. *Science* 1955; 122: 625–631. doi:  
44  
45 10.1126/science.122.3171.625
- 46  
47  
48 16 Dong XQ, Simon MA, Beck TT, *et al.* Elder abuse and mortality: the role of  
49  
50 psychological and social wellbeing. *Gerontology* 2011; 57: 549–558. doi:  
51  
52 10.1159/000321881
- 53  
54  
55 17 Luo Y, Waite LJ, Mistreatment and psychological well-being among older adults:  
56  
57  
58  
59  
60



- 1  
2  
3  
4 exploring the role of psychosocial resources and deficits. *J Gerontol B Psychol Sci*  
5  
6 *Soc Sci*, 2011; 66: 217–229. doi: 10.1093/geronb/gbq096  
7  
8  
9 18 Fisher BS, Regan SL, The extent and frequency of abuse in the lives of older women and  
10  
11 their relationship with health outcomes. *Gerontologist* 2006; 46: 200–209. doi:  
12  
13 10.1093/geront/46.2.200  
14  
15  
16 19 Cohen S, Wills TA. Stress, social support, and the buffering hypothesis. *Psychological*  
17  
18 *Bulletin* 1985; 98: 310–357.  
19  
20  
21 20 Lazarus R S, Folkman S, *Stress, Appraisal and Coping*. New York: Springer, 1984.  
22  
23  
24 21 Pearlin LI, Schieman S, Fazio EM, *et al*. Stress, health, and the life course: Some  
25  
26 conceptual perspectives. *Journal of Health and Social Behavior* 2005; 46: 205–219.  
27  
28 doi:10.1177/002214650504600206  
29  
30  
31 22 Taylor SE, Stanton AL. Coping resources, coping processes, and mental health. *The*  
32  
33 *Annual Review of Clinical Psychology* 2007; 3: 377–401.  
34  
35 doi:10.1146/annurev.clinpsy.3.022806.091520  
36  
37  
38 23 Comijs HC, Penninx BW, Knipscheer, KP, *et al*. Psychological distress in victims of elder  
39  
40 mistreatment: the effects of social support and coping. *J Gerontol B Psychol Sci Soc*  
41  
42 *Sci*, 1999; 54: 240–245. PMID: 12382593  
43  
44  
45  
46 24 United Nations Population Fund (UNFPA). *Report on the status of elderly in select states*  
47  
48 *of India, 2011*. New Delhi: United Nations Population Fund, 2012.  
49  
50  
51 25 Goldberg DP, Gater R, Sartorius N, *et al*. The validity of two versions of the GHQ in the  
52  
53 WHO study of mental illness in general health care. *Psychological Medicine* 1997; 27:  
54  
55 191–197. doi: 10.1017/S0033291796004242  
56  
57  
58  
59  
60

- 1  
2  
3  
4 26 Shamasunder C, Srram TG, Murali RSG, *et al.* Validity of a short 5 - item version of the  
5  
6 General Health Questionnaire (GHQ). *Indian J Psychiatry* 1986; 28: 217–219.  
7  
8  
9 PMCID: PMC3172533  
10  
11 27 Shivakumar P, Sadanand S, Bharath S, *et al.* Identifying psychological distress in elderly  
12  
13 seeking health care. *Indian J Public Health* 2015; 59: 18–23.  
14  
15  
16 doi:10.4103/0019-557X.152849  
17  
18  
19 28 Gautam S, Nijhawan M, Kamal P, Standardisation of Hindi version of Goldberg's General  
20  
21 Health Questionnaire. *Indian J Psychiatry* 1987; 29: 63-66. PMID: 21927210  
22  
23  
24 29 Kuruvilla A, Pothan M, Philip K, *et al.* The validation of the Tamil version of the 12 item  
25  
26 general health questionnaire. *Indian J Psychiatry* 1999; 41: 217–221. PMCID:  
27  
28  
29 PMCID2962995  
30  
31 30 Goldberg D, Oldehinkel T, Ormel J, Why GHQ threshold varies from one place to another.  
32  
33  
34 *Psychological Medicine* 1998; 28: 915–921. PMID: 9723146  
35  
36  
37 31 Pearlin LI, Schooler C. The structure of coping. *Journal of Health and Social Behavior*  
38  
39 1978; 22, 337–356. PMID: 649936  
40  
41  
42 32 Sherbourne CD, Stewart AL. The MOS social support survey. *Social Science & Medicine*  
43  
44 1991; 32: 713–714. PMID: 2035047  
45  
46  
47 33 Timmerman IGH, Emanuels-Zuurveen ES, Emmelkamp PMG. The Social Support  
48  
49 Inventory (SSI): A Brief Scale to Assess Perceived Adequacy of Social Support. *Clin*  
50  
51 *Psychol Psychother* 2000; 7: 401–410.  
52  
53  
54 doi:10.1002/1099-0879(200011)7:5<401::AID-CPP253>3.0.CO;2-I  
55  
56  
57 34 Martin P, Hagberg B, Poon LW. Predictors of loneliness in centenarians: A parallel study.  
58  
59  
60

- 1  
2  
3  
4 *J Cross Cult Gerontol* 1997; 12: 203–224. PMID: 14617927  
5  
6 35 Tachè J, Selye H. On stress and coping mechanisms. *Issues in Mental Health Nursing*  
7  
8 1985; 7: 1–4, 3–24. doi: 10.3109/01612848509009447  
9  
10  
11 36 Chokkanathan, S. Resources, stressors and psychological distress among older adults in  
12  
13 Chennai, India. *Social Science & Medicine* 2009; 68: 243–250. doi:  
14  
15 10.1016/j.socscimed.2008.10.008  
16  
17  
18 37 Segal U. Family violence: a focus on India. *Aggression and Violent Behavior* 1999; 4:  
19  
20 213–231. doi:10.1016/S1359-1789(97)00051-7  
21  
22  
23 38 Nagpaul K. Elder abuse among Asian Indians: traditional versus modern perspectives.  
24  
25 *Journal of Elder Abuse & Neglect* 1998; 9: 77–92. doi: 10.1300/J084v09n02\_07  
26  
27  
28 39 Carter KN, Blakely T, Collings S, *et al.* What is the association between wealth and  
29  
30 mental health? *J Epidemiol Community Health* 2008; 63: 221–226.  
31  
32 doi:10.1136/jech..079483  
33  
34  
35 40 WHO. *The Solid Facts: Social Determinants of Health*. Copenhagen: World Health  
36  
37 Organization Regional Office for Europe, 2003.  
38  
39  
40 41 Gallo LC, Matthews KA, Understanding the association between socioeconomic status  
41  
42 and physical health: do negative emotions play a role? *Psychological Bulletin* 2003;  
43  
44 129: 10–51. doi: 10.1037/0033-2909.129.1.10  
45  
46  
47 42 Jeon GS, Jang SN, Rhee SJ, *et al.* Gender differences in correlates of mental health among  
48  
49 elderly Koreans. *J Gerontol B Psychol Sci Soc Sci*, 2007; 62B, 5, S323–S329. PMID:  
50  
51 17906176  
52  
53  
54 43 Ormel J, Kempen GIJM, Penninx BWJH, *et al.* Chronic medical conditions and mental  
55  
56  
57  
58  
59  
60

- 1  
2  
3  
4 health in older people: disability and psychosocial resources mediate specific mental  
5  
6 health effects. *Psychological Medicine* 1997; 27: 1065–1077. PMID: 9300512  
7  
8  
9 44 Joshi K, Kumar R, Avasthi A, Morbidity profile and its relationship with disability and  
10  
11 psychological distress among elderly people in Northern India. *Int J Epidemiol* 2003;  
12  
13 32: 978–987. PMID: 14681260  
14  
15  
16 45 Shih M, Simon PA. Health-related quality of life among adults with serious psychological  
17  
18 distress and chronic medical conditions. *Qual Life Res* 2008; 17, 521–528.  
19  
20  
21 doi:10.1007/s11136-008-9330-9  
22  
23  
24 46 Rajkumar AP, Thangadurai P, Senthilkumar P, *et al.* Nature, prevalence and factors  
25  
26 associated with depression among the elderly in a rural South Indian community.  
27  
28  
29 *International Psychogeriatrics* 2009; 21: 372–378. doi: 10.1017/S1041610209008527  
30  
31  
32 47 World Health Organization, Calouste Gulbenkian Foundation (WHO, CGF). *Social*  
33  
34 *Determinants of Mental Health*. Geneva: World Health Organization, 2014.  
35  
36  
37 48 Kumar Y, Bhargava A, Elder abuse in Indian families: problems and preventive actions.  
38  
39 *IJSRP* 2014; 4: 1–8. <http://www.ijsrp.org/research-paper-1014/ijsrp-p3498.pdf>  
40  
41 (accessed 14 Oct 2016)  
42  
43  
44 49 Patel V. Mental health in low- and middle-income countries. *British Medical Bulletin*  
45  
46 2007; 81 and 82, 81–96. doi: 10.1093/bmb/ldm010  
47  
48  
49 50 Stone J, Evandrou M, Falkingham J. The transition to living alone and psychological  
50  
51 distress in later life. *Age and Ageing* 2013; 42: 366–372. doi:10.1093/ageing/aft006.  
52  
53  
54 51 Vlachantoni A, Robards J, Falkingham J *et al.* Trajectories of informal care and health.  
55  
56  
57 *SSM -Population Health* 2016; 2: 495–501. doi:10.1016/j.ssmph.2016.05.009  
58  
59  
60

Table 1. Distribution of GHQ-12  $\geq 4$  (unweighted data)

| Variables                                                     | Distribution (%) | Number of respondents | % of GHQ-12 score $\geq 4$ | P value (Pearson Chi square test) |
|---------------------------------------------------------------|------------------|-----------------------|----------------------------|-----------------------------------|
| <b>Total</b>                                                  | 100.0            | 9,589                 | 40.6                       |                                   |
| <b>Experience abuse last month</b>                            |                  |                       |                            |                                   |
| No                                                            | 95.5             | 9,157                 | 39.7                       | .000                              |
| Yes                                                           | 4.5              | 432                   | 61.6                       |                                   |
| <b>Selected psychosocial and material resources variables</b> |                  |                       |                            |                                   |
| <b>Marital status</b>                                         |                  |                       |                            |                                   |
| Widowed                                                       | 40.5             | 5,710                 | 48.0                       | .000                              |
| Currently married/living together                             | 59.5             | 3,879                 | 35.7                       |                                   |
| <b>Social activities</b>                                      |                  |                       |                            |                                   |
| No listed social activity                                     | 19.4             | 1,860                 | 55.8                       | .000                              |
| Have social activity                                          | 80.6             | 7,729                 | 37.0                       |                                   |
| <b>Have someone trust or confide</b>                          |                  |                       |                            |                                   |
| No                                                            | 17.1             | 1,642                 | 59.7                       | .000                              |
| Yes                                                           | 82.9             | 7,947                 | 36.7                       |                                   |
| <b>Feel able to manage situations</b>                         |                  |                       |                            |                                   |
| Hardly ever                                                   | 24.0             | 2,298                 | 76.3                       | .000                              |
| Sometimes                                                     | 63.2             | 6,057                 | 32.8                       |                                   |
| Most of the time                                              | 12.9             | 1,234                 | 12.9                       |                                   |
| <b>Income</b>                                                 |                  |                       |                            |                                   |
| No income                                                     | 47.5             | 4,553                 | 46.2                       |                                   |
| One source                                                    | 44.7             | 4,290                 | 36.9                       |                                   |
| Multiple sources                                              | 7.8              | 746                   | 28.3                       |                                   |
| <b>Household wealth index</b>                                 |                  |                       |                            |                                   |
| Lowest                                                        | 20.0             | 1,915                 | 64.1                       | .000                              |
| Second                                                        | 20.4             | 1,958                 | 48.4                       |                                   |
| Middle                                                        | 19.6             | 1,884                 | 40.4                       |                                   |
| Fourth                                                        | 19.8             | 1,901                 | 28.8                       |                                   |
| Highest                                                       | 20.1             | 1,931                 | 21.4                       |                                   |
| <b>Other control variables</b>                                |                  |                       |                            |                                   |
| <b>age</b>                                                    |                  |                       |                            |                                   |
| 60-69                                                         | 63.4             | 6,082                 | 35.6                       | .000                              |
| 70-79                                                         | 26.4             | 2,533                 | 46.9                       |                                   |
| 80+                                                           | 10.2             | 974                   | 55.9                       |                                   |
| <b>Sex</b>                                                    |                  |                       |                            |                                   |
| Men                                                           | 47.4             | 4,543                 | 36.2                       | .000                              |
| Women                                                         | 52.6             | 5,046                 | 44.7                       |                                   |
| <b>Education</b>                                              |                  |                       |                            |                                   |
| None                                                          | 46.1             | 4,422                 | 52.1                       | .000                              |
| 1-4 years                                                     | 12.9             | 1,241                 | 45.2                       |                                   |
| 5-7 years                                                     | 13.5             | 1,297                 | 36.9                       |                                   |
| 8+ years                                                      | 27.4             | 2,629                 | 21.0                       |                                   |
| <b>Caste</b>                                                  |                  |                       |                            |                                   |
| Scheduled Tribe/Scheduled Caste                               | 24.2             | 2,316                 | 47.4                       | .000                              |
| Other Backward Caste                                          | 34.1             | 3,274                 | 42.9                       |                                   |
| Others                                                        | 39.1             | 3,753                 | 33.4                       |                                   |
| Unknown                                                       | 2.6              | 246                   | 58.5                       |                                   |
| <b>Working status</b>                                         |                  |                       |                            |                                   |
| Has never worked                                              | 36.2             | 3,472                 | 41.2                       | .000                              |
| Has ever worked but not now                                   | 40.7             | 3,904                 | 42.6                       |                                   |
| Has ever worked and is now working                            | 23.1             | 2,213                 | 36.2                       |                                   |
| <b>Self-reported health</b>                                   |                  |                       |                            |                                   |
| Excellent /Very good                                          | 16.2             | 1,557                 | 19.1                       | .000                              |
| Good                                                          | 30.0             | 2,875                 | 28.1                       |                                   |
| Fair                                                          | 36.5             | 3,499                 | 48.7                       |                                   |
| Poor                                                          | 17.3             | 1,658                 | 65.6                       |                                   |
| <b>Chronic disease</b>                                        |                  |                       |                            |                                   |
| No                                                            | 35.3             | 3,389                 | 35.3                       | .000                              |
| 1 type                                                        | 32.2             | 3,087                 | 41.7                       |                                   |
| 2 more types                                                  | 32.5             | 3,113                 | 45.4                       |                                   |
| <b>ADL</b>                                                    |                  |                       |                            |                                   |
| No need for assistance                                        | 92.7             | 8,890                 | 38.1                       | .000                              |
| Light need                                                    | 3.8              | 369                   | 67.8                       |                                   |
| Heavy need                                                    | 3.4              | 330                   | 79.1                       |                                   |
| <b>Disability</b>                                             |                  |                       |                            |                                   |
| No disability                                                 | 27.2             | 2,606                 | 25.1                       | .000                              |
| Light                                                         | 44.7             | 4,285                 | 37.6                       |                                   |

| Variables                 | Distribution (%) | Number of respondents | % of GHQ-12 score $\geq 4$ | P value (Pearson Chi square test) |
|---------------------------|------------------|-----------------------|----------------------------|-----------------------------------|
| Medium                    | 18.6             | 1,788                 | 54.5                       |                                   |
| Heavy                     | 9.5              | 910                   | 72.0                       |                                   |
| <b>Living arrangement</b> |                  |                       |                            |                                   |
| Alone                     | 6.3              | 605                   | 50.9                       | .000                              |
| Spouse only               | 14.9             | 1,432                 | 34.9                       |                                   |
| At least one child        | 71.3             | 6,833                 | 40.5                       |                                   |
| Others                    | 7.5              | 719                   | 44.6                       |                                   |
| <b>Residence</b>          |                  |                       |                            |                                   |
| Rural                     | 52.2             | 5,001                 | 45.7                       | .000                              |
| Urban                     | 47.8             | 4,588                 | 35.1                       |                                   |
| <b>State</b>              |                  |                       |                            |                                   |
| Himachal Pradesh          | 15.0             | 1,440                 | 23.5                       | .000                              |
| Punjab                    | 13.1             | 1,255                 | 20.8                       |                                   |
| West Bengal               | 13.2             | 1,263                 | 60.5                       |                                   |
| Odisha                    | 15.3             | 1,467                 | 55.5                       |                                   |
| Maharashtra               | 14.6             | 1,399                 | 44.3                       |                                   |
| Kerala                    | 14.0             | 1,341                 | 28.0                       |                                   |
| Tamil Nadu                | 14.9             | 1,424                 | 50.8                       |                                   |

Source: Authors' analysis of UNFPA Building Knowledge Base on Ageing in India 2011 survey

Table 2. Odds ratios for GHQ-12 score  $\geq 4$  (N=9,589)

| Variables                                                  | Model 1 | Model 2 | Model 3 |
|------------------------------------------------------------|---------|---------|---------|
| <b>Experienced abuse in last month</b> No (ref)            |         |         |         |
| Yes                                                        | 2.44*** | 1.60*** | 1.11    |
| <b>Psychosocial and material resources</b>                 |         |         |         |
| <b>Marital status</b> Widowed (ref)                        |         |         |         |
| Currently married/living together                          |         | 1.14    | 1.14    |
| <b>Social activities participation</b> No (ref)            |         |         |         |
| Yes                                                        |         | 0.85*   | 0.85*   |
| <b>Have someone trust or confide</b> No (ref)              |         |         |         |
| Yes                                                        |         | 0.69*** | 0.69*** |
| <b>Feel able to manage situations</b> Hardly ever (ref)    |         |         |         |
| Sometimes                                                  |         | 0.25*** | 0.25*** |
| Most of the time                                           |         | 0.12*** | 0.12*** |
| <b>Income</b> No income (ref)                              |         |         |         |
| One resources                                              |         | 0.97    | 0.96    |
| Multiple resources                                         |         | 0.74*   | 0.73**  |
| <b>Household wealth index</b> Lowest (ref)                 |         |         |         |
| Second                                                     |         | 0.83*   | 0.80*   |
| Middle                                                     |         | 0.78**  | 0.73*** |
| Fourth                                                     |         | 0.62*** | 0.57*** |
| Highest                                                    |         | 0.53*** | 0.49*** |
| <b>Other control variables</b>                             |         |         |         |
| <b>Age</b> 60-69 (ref)                                     |         |         |         |
| 70-79                                                      |         | 1.20**  | 1.21**  |
| 80+                                                        |         | 1.23*   | 1.25*   |
| <b>Gender</b> Men (ref)                                    |         |         |         |
| Women                                                      |         | 1.15    | 1.17    |
| <b>Education</b> No schooling (ref)                        |         |         |         |
| 1-4 years                                                  |         | 0.88    | 0.88    |
| 5-7 years                                                  |         | 0.85    | 0.85    |
| 8+ years                                                   |         | 0.56*** | 0.57*** |
| <b>Caste</b> Scheduled Tribe/Scheduled Caste (ref)         |         |         |         |
| Other Backward Caste                                       |         | 0.92    | 0.92    |
| Others                                                     |         | 1.05    | 1.07    |
| Unknown                                                    |         | 1.09    | 1.07    |
| <b>Working status</b> Not work (ref)                       |         |         |         |
| Ever work but not now                                      |         | 1.19*   | 1.23*   |
| Ever work and now                                          |         | 1.08    | 1.12    |
| <b>Self-reported health</b> Excellent/very good/good (ref) |         |         |         |
| Fair                                                       |         | 2.11*** | 2.11*** |
| Poor                                                       |         | 3.88*** | 3.90*** |
| <b>Chronic disease</b> No (ref)                            |         |         |         |
| One type                                                   |         | 1.17*   | 1.17*   |
| More than one types                                        |         | 1.31*** | 1.31*** |
| <b>Difficulty with ADLs</b> No need for assistance (ref)   |         |         |         |
| Light need                                                 |         | 1.21    | 1.23    |
| Heavy need                                                 |         | 1.82*** | 1.83*** |
| <b>Disability</b> No disability (ref)                      |         |         |         |
| Light                                                      |         | 1.56*** | 1.56*** |
| Medium                                                     |         | 2.24*** | 2.22*** |
| Heavy                                                      |         | 3.40*** | 3.38*** |
| <b>Living arrangement</b> Alone (ref)                      |         |         |         |
| Spouse only                                                |         | 0.80    | 0.80    |
| At least one child                                         |         | 1.16    | 1.16    |
| Others                                                     |         | 1.25    | 1.25    |
| <b>Residence</b> Rural (ref)                               |         |         |         |
| Urban                                                      |         | 0.90    | 0.90    |
| <b>State</b> Himachal Pradesh (ref)                        |         |         |         |
| Punjab                                                     |         | 0.59*** | 0.60*** |
| West Bengal                                                |         | 2.70*** | 2.66*** |
| Odisha                                                     |         | 2.85*** | 2.81*** |
| Maharashtra                                                |         | 1.71*** | 1.68*** |
| Kerala                                                     |         | 0.98    | 0.98    |
| Tamil Nadu                                                 |         | 3.89*** | 3.82*** |
| Abuse* Second quintile                                     |         |         | 1.39    |
| Abuse * Middle quintile                                    |         |         | 2.96**  |

| Variables                                        | Model 1 | Model 2 | Model 3 |
|--------------------------------------------------|---------|---------|---------|
| Abuse * Fourth quintile                          |         |         | 4.37*** |
| Abuse * Highest quintile                         |         |         | 4.57**  |
| Abuse * High education                           |         |         | 0.74    |
| Abuse * Have someone to trust                    |         |         | 0.87    |
| Abuse * Feel able to manage situations some time |         |         | 0.92    |
| Abuse * Feel able to manage situations most time |         |         | 1.02    |
| <b>Constant</b>                                  | 0.66*** | 0.70    | 0.72    |
| <b>Cox &amp; Snell R<sup>2</sup></b>             | 0.008   | 0.327   | 0.328   |
| <b>Nagelkerke R<sup>2</sup></b>                  | 0.011   | 0.441   | 0.442   |

Source: Authors' analysis of UNFPA Building Knowledge Base on Ageing in India 2011 survey

For peer review only



Figure 1. Predicted probability of GHQ-12 $\geq$ 4 among older adults by elder abuse and household wealth quintile

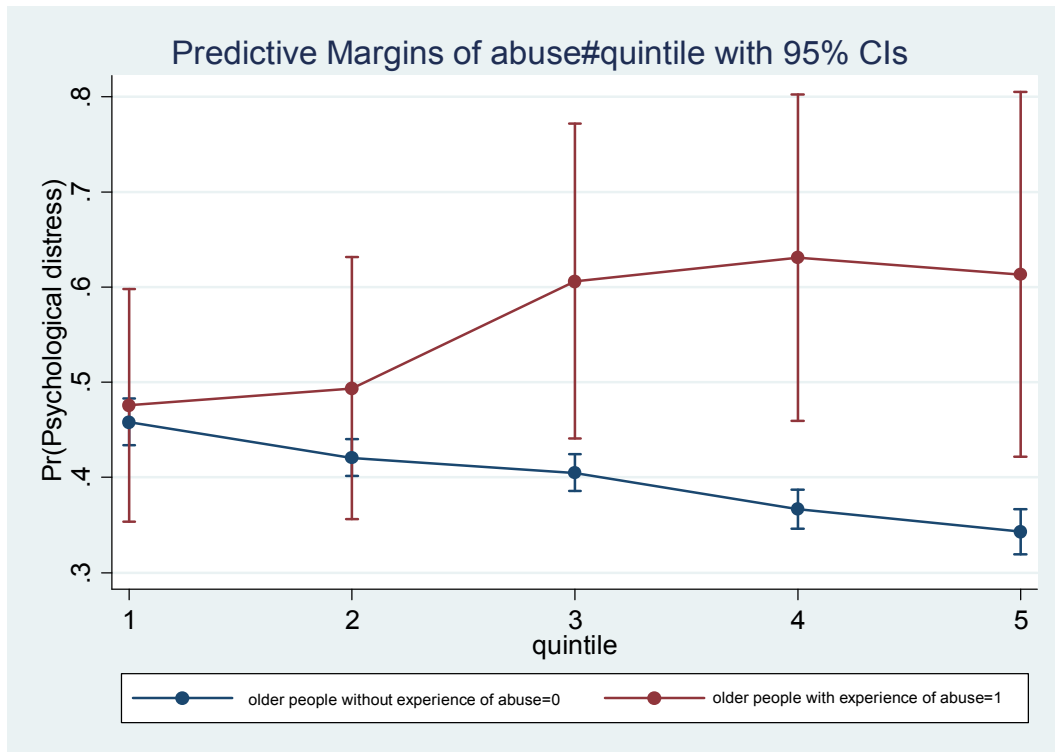

Source: Authors' analysis of UNFPA Building Knowledge Base on Ageing in India 2011 survey

# BMJ Open

## Elder abuse as a risk factor for psychological distress among older adults in India: a cross-sectional study

|                                 |                                                                                                                                                                                                                                                                                            |
|---------------------------------|--------------------------------------------------------------------------------------------------------------------------------------------------------------------------------------------------------------------------------------------------------------------------------------------|
| Journal:                        | <i>BMJ Open</i>                                                                                                                                                                                                                                                                            |
| Manuscript ID                   | bmjopen-2017-017152.R1                                                                                                                                                                                                                                                                     |
| Article Type:                   | Research                                                                                                                                                                                                                                                                                   |
| Date Submitted by the Author:   | 21-Aug-2017                                                                                                                                                                                                                                                                                |
| Complete List of Authors:       | Evandrou , Maria ; University of Southampton, Centre for Research on Ageing, ESRC Centre for Population Change<br>Falkingham, J; University of Southampton<br>Qin, Min; Centre for Research on Ageing, ESRC Centre for Population Change<br>Vlachantoni, Athina; University of Southampton |
| <b>Primary Subject Heading</b>: | Public health                                                                                                                                                                                                                                                                              |
| Secondary Subject Heading:      | Mental health                                                                                                                                                                                                                                                                              |
| Keywords:                       | Elder abuse, Risk factors, MENTAL HEALTH, Psychological distress, India                                                                                                                                                                                                                    |
|                                 |                                                                                                                                                                                                                                                                                            |

SCHOLARONE™  
Manuscripts

1  
2  
3  
4 **Elder abuse as a risk factor for psychological distress**  
5  
6 **among older adults in India: a cross-sectional study**  
7  
8  
9

10  
11 Maria Evandrou<sup>1</sup>, Jane Falkingham<sup>1</sup>, Min Qin<sup>1</sup> and Athina Vlachantoni<sup>1</sup>  
12

13  
14 <sup>1</sup>Centre for Research on Ageing and ESRC Centre for Population Change, University of  
15  
16 Southampton, Southampton, SO17 1BJ, UK  
17  
18  
19

20  
21 Correspondence to

22 Dr. Min Qin

23  
24 Centre for Research on Ageing and ESRC Centre for Population Change

25  
26 University of Southampton

27  
28 Southampton, SO17 1BJ

29  
30 UK

31  
32 Tel +44 (0)23 80 594290

33  
34 Fax +44 (0)23 80 594290

35  
36 Email: [min.qin@soton.ac.uk](mailto:min.qin@soton.ac.uk)  
37  
38  
39  
40  
41  
42

43 Word count 5014  
44  
45  
46  
47  
48  
49  
50  
51  
52  
53  
54  
55  
56  
57  
58  
59  
60

## Abstract

**Objectives** This study examines the association between elder abuse and psychological distress among older adults in India, and explores whether this association varies by the level of psychosocial and material resources.

**Design** The study uses a cross-sectional survey design.

**Setting** The data are drawn from a representative sample of 9,589 adults aged 60 and above in seven Indian states - Himachal Pradesh, Punjab, West Bengal, Odisha, Maharashtra, Kerala and Tamil Nadu – in 2011.

**Statistical analyses** Secondary analysis, using bi-variate and multivariate logistic regression models, is conducted using the UNFPA project Building Knowledge Base on Ageing in India (BKPAI) survey. Elder abuse (physical and/or emotional) emanating from family members in the previous month before the survey is examined. Multivariate models are run on the total analytical sample, and for men and women separately.

**Results** The overall prevalence of psychological distress amongst persons aged 60 and over living in the seven Indian States is 40.6 percent. Among those older persons who experienced some form of physical or emotional abuse or violence in the last month, the prevalence of psychological distress is much higher than that in the general older population, at 61.6 percent ( $P<0.001$ ). The results show that the experience of abuse is negatively associated with the mental health of older adults, and this relationship persists even after controlling for demographic and socio-economic factors (OR=1.60, 95% CI=1.22-2.09). The findings also suggest that household wealth has an inverse relationship with mental health, with the

1  
2  
3  
4 association between experiencing elder abuse and reporting poor mental health being  
5  
6 strongest amongst older people in wealthy households.  
7

8  
9 **Conclusions** Elder abuse in India is currently a neglected phenomenon, and greater  
10  
11 recognition of the link between abuse and mental health is critical in order to improve the  
12  
13 well-being of vulnerable older adults, some of whom may be 'hidden' within well-off  
14  
15 households.  
16

17  
18 **Key Words:** Elder abuse—Risk factors—Mental health—Psychological distress—India  
19  
20  
21  
22  
23  
24  
25

#### 26 **Strengths and limitations of this study**

27

- 28  
29 • The findings of the study are from a large representative sample of 9,692 older adults  
30  
31 from selected Indian states.  
32  
33
- 34  
35 • Abuse data in this study are self-reported; there is no validation (or under-reporting)  
36  
37 by agencies charged with investigating elder abuse.  
38  
39
- 40  
41 • It is possible that older people already had stress before the experience of abuse, and  
42  
43 at the time of the interview were more likely than others to recall past experiences  
44  
45 such as abuse.  
46  
47  
48  
49  
50  
51  
52  
53  
54  
55  
56  
57  
58  
59  
60

## INTRODUCTION

India's population is ageing. With improvements in mortality as a result of rising living standards, improved sanitation, public health and medical advances, more people are living longer and surviving into old age. Such trends, combined with recent falls in fertility, mean that the number of older people is both increasing in absolute terms and also as a share of the population. In 1980, individuals aged 60 and over accounted for just 5.9 percent of the Indian population; by 2015 this had risen to 8.9 percent, comprising 116.5 million people, and by 2050 older people are projected to constitute nearly one fifth (19.4%) of the total population, with 330 million Indians in their sixties or older. <sup>1</sup> The changes in the age structure of India's population are being accompanied by other social and economic transformations including rapid urbanization and industrialization. Increasing women's participation in paid employment, greater internal and international mobility amongst the younger generation and the growth of individualism are all impacting upon the traditional Indian family system; a system which has emphasized the obligation of sons and their wives to respect, obey, and provide care for their aged parents. <sup>2</sup>

Traditionally, elders have been respected in Indian society, and families are the principal financial, emotional and physical caregivers for older relatives. <sup>3</sup> Although this tradition remains today, <sup>4</sup> qualitative studies have demonstrated that both respect for older people and the caring traditions of the extended family are on the wane in the larger context of societal and cultural changes. Older people are more likely to be exposed to abuse, isolation and abandonment. <sup>5-6</sup> Elder abuse is internationally defined as a "single, or repeated act, or lack of appropriate action, occurring within any relationship where there is an expectation of trust

1  
2  
3 which causes harm or distress to an older person".<sup>7</sup> Elder abuse is estimated to affect one in  
4  
5  
6 six older adults worldwide, has become a growing public health challenge and requires more  
7  
8 attention by health care systems, researchers, and more evidence based intervention.<sup>8-9</sup>

9  
10  
11 Across a wide range of countries, risk factors for elder abuse include functional dependence  
12  
13 or physical disability, poor physical and mental health and low socio-economic status. Most  
14  
15 international studies found women are more likely than men to experience elder abuse.<sup>10</sup>

16  
17  
18 Several theories may explain the possible causes of elder abuse by family members.<sup>11</sup>

19  
20  
21 According to the social exchange theory, elder abuse may arise because of older people's  
22  
23 dependence on the family members, while situational theory focuses on the role of stress and  
24  
25 the burden of caregiving as precursors to elder abuse. An overburdened family member who  
26  
27 cannot cope with caring demands may create an environment which is conducive to abuse.  
28  
29 Symbolic interactionism theory emphasizes the role of cultural values and expectations in  
30  
31 influencing the perception of elder abuse. For example, in some elders cultural perceptions,  
32  
33 going to live in a nursing homes is considered to be a form of abuse, whereas their children  
34  
35 may define it as a sign of caring.  
36  
37  
38  
39  
40  
41

42  
43 Elder abuse can manifest as physical, emotional, sexual, and financial abuse, and/or as  
44  
45 intentional or unintentional neglect. In the Indian context, older people customarily perceive  
46  
47 the word 'abuse' to mean extreme behaviour of violence, but not neglect/abandonment.

48  
49 However, in qualitative studies, older people have acknowledged the existence of  
50  
51 maltreatment (lack of dignified living and disrespect) and neglect within their society and  
52  
53 community. In addition, women have been considered as the worst sufferers with no income  
54  
55 of their own and being dependent on other family members for everything.<sup>12</sup> Qualitative  
56  
57  
58  
59  
60

1  
2  
3  
4 research has found that selected later life mental disorders may be attributed to abuse, neglect,  
5  
6 or a lack of love from children.<sup>5</sup> However, psychological distress in later life remains an  
7  
8 under-researched area in India, particularly in terms of the psychological consequences  
9  
10 associated with elder abuse and neglect.<sup>12-13</sup>  
11  
12  
13

## 14 15 16 17 18 **THE RELATIONSHIP BETWEEN ELDER ABUSE, RESOURCES AND** 19 20 **PSYCHOLOGICAL DISTRESS** 21 22

23  
24 Psychological distress is widely used as an indicator of the mental health of the population  
25  
26 within the field of public health (psychological distress and poor mental health are  
27  
28 interchangeable terms in this paper). Distress comprises of a variety of symptoms such as  
29  
30 depression, anxiety, stress and insomnia. The level of such distress experienced by an  
31  
32 individual at any point in time is determined by various biological and psychosocial factors.  
33  
34  
35  
36  
37  
38  
39  
40  
41  
42  
43  
44  
45  
46  
47  
48  
49  
50  
51  
52  
53  
54  
55  
56  
57  
58  
59  
60  
14-15 Elder abuse is recognised as a stressful experience which has been found to have harmful  
effects on mental health,<sup>16</sup> with depression, anxiety and post-traumatic disorder being  
reported as the most prevalent psychological consequences.<sup>17-18</sup>

The general stress theory postulates that the effect of stressors (i.e. stressful events) on  
psychological health operates in three phases: alarm, resistance, and exhaustion, and is a  
process that involves changes in individuals' immune system, endocrine system and  
cardiovascular reactivity.<sup>19</sup> When problems accumulate, persist and strain individuals, then  
adaptation resources are depleted and a stimulated parasympathetic system may lead to  
worrying, anxiety, depression, anger and/or other physical illness. Studies have found that



1  
2  
3  
4 older adults who are mistreated have higher levels of psychological distress than those who  
5  
6 have no such experience.<sup>20-21</sup> The frequency or type of elder abuse also has an impact on  
7  
8 mental health. Fisher and Regan (2006)<sup>22</sup> found that repeated abuse or multiple types of elder  
9  
10 abuse (e.g. emotional) were risk factors for depression or anxiety among older women. Based  
11  
12 on previous empirical findings, this paper hypothesizes (H1) *that older adults who report*  
13  
14 *experiencing elder abuse will have higher odds of psychological distress than those who do*  
15  
16 *not report such experiences.*  
17  
18  
19

20  
21  
22 However, many individuals who experience stressful events do not go on to develop a  
23  
24 psychological illness. The stress-buffering model suggests that psychosocial resources  
25  
26 moderate the deleterious effects of high levels of stress. The statistical interaction between  
27  
28 stress and resources can be used to test these moderating effects.<sup>23</sup> Resources may intervene  
29  
30 between the experience of stress and the onset of mental illness by providing a solution to the  
31  
32 problem or reducing the perceived importance of the problem, which in turn helps to decrease  
33  
34 or eliminate the stress reaction. Psychosocial resources that can buffer the negative impact of  
35  
36 life events on psychological well-being include subjective resources such as high self-esteem,  
37  
38 mastery, social support and social participation, and objective resources such as  
39  
40 socioeconomic status, including income and household wealth.<sup>24-26</sup> For instance, a beneficial  
41  
42 effect of social support on one's mental health could occur thanks to large social networks  
43  
44 providing individuals with regular positive experiences and stable, socially-rewarding roles in  
45  
46 the community. This kind of support could provide a positive effect, a sense of predictability  
47  
48 and stability in one's life situation, and recognition of self-worth, all of which are related to  
49  
50 overall well-being. At the same time, material resources such as income and household  
51  
52  
53  
54  
55  
56  
57  
58  
59  
60

1  
2  
3  
4  
5  
6  
7  
8  
9  
10  
11  
12  
13  
14  
15  
16  
17  
18  
19  
20  
21  
22  
23  
24  
25  
26  
27  
28  
29  
30  
31  
32  
33  
34  
35  
36  
37  
38  
39  
40  
41  
42  
43  
44  
45  
46  
47  
48  
49  
50  
51  
52  
53  
54  
55  
56  
57  
58  
59  
60

wealth can offer protection against negative experiences associated with economic problems. Indeed, previous empirical studies have found that in the presence of stress from elder abuse, supportive relationships may buffer the effect of stress.<sup>27, 21</sup> As such, this paper hypothesizes that (H2) *the negative association of elder abuse with psychological distress will be stronger for those with fewer psychosocial and material resources than for those with more psychosocial and material resources.* This study aims to contribute to the literature by investigating the association between elder abuse and psychological distress among older adults in India and examining whether such association varies by the level of psychosocial and material resources at the older adults' disposal.

## DATA AND METHODS

This study analyses data collected as part of the UNFPA 'Building Knowledge Base on Ageing in India (BKPAI)' project. The BKPAI Survey was conducted in 2011 in seven major demographically advanced states of India - Himachal Pradesh, Punjab, West Bengal, Odisha, Maharashtra, Kerala and Tamil Nadu. A representative sample was obtained using a random sampling method covering the Northern, Southern, Western and Eastern regions. The detailed information about the survey sampling is described in a previous report.<sup>28</sup> The primary sampling units were households. All those aged 60 and above in the sampled households were interviewed face-to-face. The completion rate for households was 94.7 percent and 92.9 percent for elderly respondents. Non-response at both the household and individual levels was adjusted through the sampling weights calculation by the research organisation. The

1  
2  
3  
4 BKPAI survey data includes information on older people's mental and physical health, their  
5  
6 living arrangements, socio-economic circumstances, including employment status and  
7  
8 household assets, as well as information on intergenerational exchanges within the family and  
9  
10 participation in social activities. The total sample size interviewed is 9,692. Of these, 103 are  
11  
12 excluded because of missing values (missingness is not mutually exclusive) on psychological  
13  
14 distress (N=36); education (N=53); whether has someone for trust/confidence (N=7); and  
15  
16 whether feels able to manage unexpected situations (N=16). The final analytical sample is  
17  
18  
19  
20  
21 9,589 adults aged 60 and above.  
22  
23  
24  
25  
26  
27

## 28 **Measurements**

### 30 *Elder abuse*

31  
32  
33  
34 In the BKPAI survey, the respondents were asked two sets of questions regarding their  
35  
36 experience of abuse since they were 60 years old and in the last month. The first question was  
37  
38 *'In the time since you completed 60 years of age have you faced any type of abuse or violence*  
39  
40 *or neglect or disrespect by any person?'* If the respondent answered 'Yes', a follow-up  
41  
42 questions asked the type of abuse (Physical abuse, Verbal abuse, Economic abuse, Showing  
43  
44 disrespect, Neglect and Other) and where it originated (within family, outside family, both  
45  
46 within family & outside family). *A further question asked 'Have you faced any type of*  
47  
48 *physical or emotional abuse or violence in the last month?'* The responses include *'1. No, 2.*  
49  
50 *Physical, 3. Emotional, 4. Both physical and emotional'*. All other types of violence other  
51  
52 than physical were merged into emotional violence. If the respondent answered in the  
53  
54  
55  
56  
57  
58  
59  
60

1  
2  
3  
4 affirmative, follow-up questions elicited the source of abuse which could include '1. Spouse,  
5  
6 2. Son, 3. Daughter, 4. Son-in-law, 5. Daughter-in-law, 6. Domestic helper, 7. Grandchildren,  
7  
8 8. Relatives, 9. Neighbours, 10. Other'.

10  
11  
12 A previous study based on this data reported that 11 percent of respondents have experienced  
13  
14 at least one type of abuse *after the age of 60*. Verbal abuse is most frequently claimed,  
15  
16 followed by disrespect, economic abuse, neglect and physical abuse, with the most common  
17  
18 perpetrator being the respondent's son.<sup>17</sup> In this study we concentrate on older adults who  
19  
20 report having experienced physical and/or emotional abuse in *the last month*, distinguishing  
21  
22 between those who report abuse by family members and others, to examine the  
23  
24 contemporaneous interaction between elder abuse, psychosocial and material resources, and  
25  
26 psychological distress. Here, abuse is limited to that reported as emanating from family  
27  
28 members as it is this form of abuse that we hypothesise may have increased as a result of  
29  
30 recent changes impacting the traditional Indian family system.  
31  
32  
33  
34  
35  
36  
37  
38  
39  
40

### 41 ***Psychological distress***

42  
43  
44 The 12-item version of the General Health Questionnaire (GHQ-12) is used as a measure of  
45  
46 psychological distress. These questions have been widely used to identify minor psychiatric  
47  
48 disorders in the general population.<sup>29</sup> The GHQ-12 has been previously validated in India in  
49  
50 clinical surveys conducted in Kannada,<sup>30-31</sup> Hindi<sup>32</sup> and Tamil.<sup>33</sup> Given that the BKPAI  
51  
52 study was conducted across multiple states with different languages and focused amongst  
53  
54 older adults, it was important for the team to test the reliability of GHQ-12 within the BKPAI.  
55  
56  
57  
58  
59  
60

1  
2  
3  
4 The measure was found to have high internal consistency with an overall Cronbach's alpha of  
5  
6 0.9. Examining each state individually, Cronbach's alpha ranged from a low of 0.7 in West  
7  
8 Bengal to a high of 0.94 in Himachal Pradesh, suggesting that the measure may be considered  
9  
10 to be valid across all seven states and in all the languages used.  
11  
12

13  
14 Using the standard GHQ scoring method, the four category responses for each of the 12  
15  
16 questions are coded (0, 0, 1, 1), with the points summed to produce a total score ranging from  
17  
18 0-12. We used a score of  $\geq 4$  as the threshold to define psychological distress according to  
19  
20 studies validating the GHQ-12 against standardized psychiatric interviews.<sup>34,31</sup> Although a  
21  
22 Likert scale (0-1-2-3) scoring method is also widely used, a previous study found that for the  
23  
24 GHQ-12, the GHQ scoring method was more effective than the Likert method when defining  
25  
26 the distressed cases.<sup>29</sup>  
27  
28  
29  
30  
31  
32  
33  
34  
35

### 36 ***Psychosocial and material resources***

37  
38  
39 An individual's psychosocial resources include personal qualities such as optimism,  
40  
41 psychological control or mastery, and self-esteem, as well as the availability of social support,  
42  
43 all of which can help to manage stressful events and contribute to better health  
44  
45 outcomes.<sup>35,24,26</sup> There are a variety of scales measuring social support and personal coping  
46  
47 resources.<sup>36-37</sup> The BKPAI was not explicitly designed to measure psychosocial resources. It  
48  
49 does, however, contain a number of important indicators of potential support and coping  
50  
51 resources, including being married or living together with one's partner, participation in  
52  
53  
54  
55  
56  
57  
58  
59  
60

1  
2  
3 social activities, having someone to trust and confide in, and feeling able to manage  
4  
5 unexpected situations.  
6  
7

8  
9 *Participation in social activities* is defined as having participated in any of the five listed  
10 activities in the last 12 months: attending a public meeting with discussion of local,  
11 community or political affairs; attending any group, club, society, union or organizational  
12 meeting; working with other people in your neighbourhood to fix or improve something;  
13 attending or participating in any religious programs/services (not including weddings and  
14 funerals); going out of the house to visit friends or relatives.  
15  
16  
17  
18  
19  
20  
21  
22  
23

24  
25 The question on *feeling able to manage unexpected situations* has three response categories:  
26 most of the time, sometimes, and hardly ever feeling that one can manage situations even  
27 when they do not turn out to be as expected.  
28  
29  
30  
31  
32

33  
34 *Material resources* include personal financial dependency (no dependency, partial  
35 dependency, full dependency) and household wealth quintile index. Household wealth  
36 quintile index is computed using principle component analysis (PCA) based on 30 assets and  
37 housing characteristics: household electrification; drinking water source; type of toilet facility;  
38 type of house; cooking fuel; house ownership; ownership of a bank or post-office account;  
39 and ownership of a mattress, pressure cooker, chair, cot/bed, table, electric fan,  
40 radio/transistor, black and white television, colour television, sewing machine, mobile  
41 telephone, any landline phone, computer, internet facility; refrigerator, watch or clock,  
42 bicycle, motorcycle or scooter, animal-drawn cart, car, water pump, thresher and tractor. This  
43  
44  
45  
46  
47  
48  
49  
50  
51  
52  
53  
54  
55  
56  
57  
58  
59  
60

1  
2  
3  
4 measure was found to provide a good socio-economic gradient of health outcomes among  
5  
6 older adults in the survey.<sup>28</sup>  
7  
8  
9

### 10 11 12 ***Other control variables*** 13

14  
15  
16 Covariates include the individual's age group, sex, education, caste, working status, living  
17  
18 arrangement, self-reported health, chronic disease, health-related limitations to daily activities,  
19  
20 disability and geographic factors (rural/ urban residence, and state). Functionality is measured  
21  
22 using two derived variables capturing a) an individual's reported need for assistance with  
23  
24 Activities of Daily Living (ADL) and b) Disability. ADLs refer to the ability to perform basic  
25  
26 daily activities; disability is associated with a decline of motor function. In general, a high  
27  
28 score of disability represents a lower ability to perform ADLs.<sup>38</sup> ADL is computed based on  
29  
30 the level of independence reported by the older person in carrying out the activities of feeding,  
31  
32 bathing, dressing, toilet, mobility and continence. Each question has three response categories:  
33  
34 'Do not require assistance; Require partial assistance; Require full assistance'. These are  
35  
36 scored as 0, 1 or 2 respectively and are then summed across the six questions, resulting in a  
37  
38 total score ranging between 0-12. Given the unequal intervals between the score, rather  
39  
40 treating it as a continuous variable, we group it into an ordered categorical variable. Older  
41  
42 respondents are defined as having 'no need for assistance' if the total score is 0, as having a  
43  
44 'light need for assistance' if the total score is between 1-5, and as having a 'heavy need for  
45  
46 assistance' if the total score is  $\geq 6$ .  
47  
48  
49  
50  
51  
52  
53  
54  
55  
56  
57  
58  
59  
60

1  
2  
3  
4 Disability is computed based on the respondents' level of reported ability to see, hear, walk,  
5  
6 chew, speak and remember. Each question has three response categories 'Yes fully, Yes  
7  
8 partially, No'. These are scored as 0, 1 or 2 respectively and are then summed across the six  
9  
10 questions, resulting in a total score of 0-12. Again, because of the unequal intervals between  
11  
12 the score, we group the total score into an ordered categorical variable. Older people are  
13  
14 defined as having 'no disability' if the total score is 0, 'light disability' if the total score is  
15  
16 between 1-2, 'medium disability' with a score of 3-4, and 'high disability' if the total score is  
17  
18  $\geq 5$ .

### 21 22 23 24 25 26 27 28 **Statistical Analyses**

29  
30  
31 The bi-variate associations of psychological distress with exposures and potential risk factors  
32  
33 are explored using the  $\chi^2$  test first. Then a series of logistic regression models are estimated  
34  
35 with the dependent variable being the report of psychological distress (GHQ  $\geq 4$  contrast to  
36  
37 GHQ  $\leq 3$ ). The first model estimates the bivariate association between elder abuse and  
38  
39 psychological distress. The second model adds the measures of psychosocial and material  
40  
41 resources and other control variables to estimate the association of elder abuse and  
42  
43 psychosocial and material resources, with psychological distress after controlling for other  
44  
45 covariates. The final model includes the interaction terms of elder abuse with psychosocial  
46  
47 and material resources variables to the main-effects-only model to examine whether  
48  
49 psychosocial and material resources buffer the association between elder abuse and  
50  
51  
52  
53  
54  
55  
56  
57  
58  
59  
60



1  
2  
3  
4 psychological distress. The logistic regression models are run for the total sample, and then  
5  
6 separately for older men and women using the Statistic software STATA12.  
7  
8

### 9 10 **Ethics approval**

11  
12 Ethical approval for this study, involving secondary data analyses, has been obtained from  
13  
14 the Ethics Committee in the University of Southampton. The survey report and a previous  
15  
16 study show that informed consent was obtained from all individuals prior to participation in  
17  
18 the primary data collection exercise. Careful attention was paid to avoid the presence of any  
19  
20 family members during the collection of data concerning elder abuse and to guarantee the  
21  
22 anonymity of all participants and the confidentiality of information.<sup>13, 28</sup>  
23  
24  
25  
26  
27

## 28 29 **RESULTS**

### 30 31 32 **Descriptive findings**

33  
34  
35 Table 1 presents descriptive statistics for the total analytical sample. The overall prevalence  
36  
37 of psychological distress amongst persons aged 60 and over living in the seven Indian States  
38  
39 is 40.6 percent. Around 5 percent of older adults had experienced some form of physical or  
40  
41 emotional abuse or violence in the last month. Among this sub-group, the prevalence of  
42  
43 psychological distress is much higher than in the general older population, at 61.6 percent  
44  
45  
46  
47  
48 (P<0.001).  
49

50  
51  
52  
53 The indicators of psychosocial resources and socio-economic status appear to have an inverse  
54  
55 relationship with psychological distress, with those older people living in households in the  
56  
57 highest (richest) wealth quintile having a prevalence rate of 21.4 percent compared to 64.1  
58  
59  
60

1  
2  
3  
4 percent amongst those living in households in the lowest (poorest) wealth quintile. Similarly,  
5  
6 those who participated in social activities in the last month are less likely to experience  
7  
8 psychological distress than those who did not (37 v. 55.8 percent respectively).  
9

10  
11  
12  
13 Indicators of health status including fair/poor self-related health, heavy difficulty with ADLs  
14  
15 and disability all show a positive association with psychological distress. Older people living  
16  
17 with their spouse only experience the lowest prevalence of psychological distress (34.9  
18  
19 percent), while those living alone show the highest prevalence (50.9 percent). Levels of  
20  
21 psychological distress increase with age and are higher among older women (44.7 percent)  
22  
23 than older men (36.2 percent). One's place of residence seems to play an important role with  
24  
25 elders living in urban areas having a lower level of psychological distress than their rural  
26  
27 counterparts (35.1 v. 45.7 percent). There are also considerable inter-state variations in the  
28  
29 prevalence of psychological distress. A relatively low level of psychological distress is found  
30  
31 among older adults in Punjab (20.8 percent) and Himachal Pradesh (23.5 percent),  
32  
33 contrasting with much higher levels in West Bengal (60.5 percent) and Odisha (55.5 percent).  
34  
35  
36  
37  
38  
39  
40  
41  
42  
43  
44

#### 45 **Multivariate analysis results**

46  
47 Table 2 shows the odds ratios from the logistic regression models. Among the total sample,  
48  
49 Model 1 shows the simple bi-variate relationships between elder abuse and psychological  
50  
51 distress. The odds ratio of 2.44 suggests that older adults who experienced abuse during last  
52  
53 month are more than twice as likely to report psychological distress than those with no such  
54  
55 experience. This effect is attenuated once psychosocial resources and other control variables  
56  
57  
58  
59  
60

1  
2  
3  
4 are added (OR=1.60, 95% CI=1.22-2.09) (Model 2). Social activity participation, social  
5  
6 support (having someone to trust) and mastery (feeling able to manage situations) are all  
7  
8 associated with psychological distress in the expected negative direction. The exception is  
9  
10 marital status, with the results indicating that older people who are currently married or living  
11  
12 together with partners are more likely to have psychological distress than those who are  
13  
14 widowed, although this finding is not statistically significant. Household wealth has an  
15  
16 inverse relationship with psychological distress. Older people's psychological distress is also  
17  
18 related to the levels of physical health and different geographic areas. For instance, older  
19  
20 people with poor self-rated health are more likely to have psychological distress than those  
21  
22 with good health (OR=3.83, 95% CI=3.24-4.52); older people living in Tamil Nadu are more  
23  
24 likely to have psychological distress than those living in Himachal Pradesh (OR=3.81, 95%  
25  
26 CI=3.01-4.81). Finally, Model 3 presents interactions between the experience of elder abuse  
27  
28 and psychosocial factors (trust and mastery) and material resources (education and wealth  
29  
30 quintile). The inclusion of interactions adds significant explanatory value to the model with a  
31  
32 likelihood ratio test p-value of 0.008. The results indicate that psychosocial resources only  
33  
34 have a direct negative association with psychological distress; the interaction terms between  
35  
36 elder abuse and psychosocial resources variables are not statistically significant. Interestingly,  
37  
38 however, positive and significant interactions are observed between the experience of elder  
39  
40 abuse and the respondents' household wealth quintile (OR=2.96, 4.37 and 4.57 for the abuse  
41  
42 among middle, fourth and highest quintile).  
43  
44  
45  
46  
47  
48  
49  
50  
51  
52

53  
54 The separate models by gender show similar patterns of bi-variate relationships between elder  
55  
56 abuse and psychological distress (for men OR=2.14, 95% CI=1.58-2.90; for women,  
57  
58  
59  
60

1  
2  
3  
4 OR=2.60, 95% CI=2.00-3.39). Interestingly among older men, the significant association  
5  
6 disappear once psychosocial resources and other control variables are added, while among  
7  
8 older women the association is attenuated but still significant (OR=1.76, 95% CI=1.23-2.50).  
9  
10  
11 The results of interactions between the experience of elder abuse and psychosocial factors  
12  
13 and material resources among women show similar patterns with the total sample.  
14

15  
16  
17 Figure 1 shows the predicted probabilities for GHQ-12  $\geq$  4 at each household wealth quintile  
18  
19 according to elder abuse experience, based on the coefficients from Model 3 among the total  
20  
21 sample. The chart shows that for those who did not experience elder abuse in the last month,  
22  
23 the probability of psychological distress decreases with the increase of household wealth.  
24  
25 However, amongst those who had experienced abuse, the opposite is found, with the  
26  
27 probability of psychological distress increasing as household wealth rises.  
28  
29  
30  
31  
32  
33  
34  
35

## 36 **DISCUSSION**

37  
38  
39 The analyses in this paper suggest that elder abuse has a significant negative association with  
40  
41 the mental health of older Indians. The results support the first hypothesis outlined in this  
42  
43 paper. Elder abuse may be thought of as a particularly stressful event in later life. Typically  
44  
45 Indian parents have continued to invest in their children into adulthood and traditionally have  
46  
47 expected to be cared for at an older age. If their investment is not reciprocated, their life is  
48  
49 likely to be coloured by a sense of injustice and exploitation,<sup>16</sup> which may lead to certain  
50  
51 negative effects such as anger, depressed mood and loneliness.<sup>39</sup> Constant negative effects  
52  
53 are known to be compromising to both physical and mental health, with the mechanism of  
54  
55  
56  
57  
58  
59  
60

1  
2  
3  
4 pathogenesis operating through physiological changes, including one's immune suppression,  
5  
6 and cardiovascular and endocrine reactivity.<sup>19,40</sup> The results suggest that women are more  
7  
8 vulnerable than men when encountering abusive behaviours from family members. This  
9  
10 might be because those women have fewer psychosocial resources<sup>12</sup> to cope with the  
11  
12 negative environment or needed medical assistance as a result of the abuse. Our results are  
13  
14 consistent with other empirical studies, suggesting that there is a harmful link between older  
15  
16 abuse and psychological health.<sup>27,41,20,21</sup> However, no evidence from this study is found for  
17  
18 buffering effects of psychosocial resources, such as social support and perceived ability to  
19  
20 control outcomes. The results from this study only highlight a direct and beneficial  
21  
22 association between psychosocial resources and psychological health, irrespective of the  
23  
24 presence of elder abuse. One possible explanation is that elder abuse is in direct conflict with  
25  
26 Indian cultural values, and thus older adults who have been abused may not disclose this  
27  
28 information or seek support due to a sense of shame and/or a fear of stigmatization.<sup>42-43</sup>  
29  
30 Another explanation may lie in the scale of the outcome variable. In this study, we focus on  
31  
32 psychological distress using a nominal scale measurement. Previous studies that have  
33  
34 demonstrated the buffering effects of psychosocial resources have measured psychological  
35  
36 distress as a ratio scale<sup>27,21</sup> and thus it is possible that by using a nominal scale we may be  
37  
38 missing some of the nuances around buffering effects. Interestingly the results in this paper  
39  
40 show that household wealth has a direct and inverse relationship with psychological distress,  
41  
42 and also offers a substantial link with the relationship between elder abuse and psychological  
43  
44 distress. Both qualitative and quantitative studies have found that individuals who have  
45  
46 financial or physical assets may feel more in control of their lives, leading to less  
47  
48  
49  
50  
51  
52  
53  
54  
55  
56  
57  
58  
59  
60

1  
2  
3 vulnerability to anxiety or mood disorders, or less severe psychological symptoms.<sup>12,44</sup>  
4  
5  
6 Unexpectedly, however, we found that the negative association between elder abuse and  
7  
8 mental health is significantly stronger among older people living in wealthier households.  
9  
10 One possible explanation might be that issues of control over property, finance, and other  
11  
12 decisions may result in more family conflict between parents and their adult children or other  
13  
14 relatives among wealthier households than in poorer households. This is consistent with  
15  
16 qualitative studies in India which have highlighted bitter battles in village families between  
17  
18 elders and adult children over land and money.<sup>12,6</sup> Adult children have been reported at times  
19  
20 to resent the expense of medical care and treatments for their aged parents, especially when  
21  
22 some of the children felt they were providing more than their fair share of the total cost.  
23  
24 Again this may be more commonplace amongst wealthier households, where private medical  
25  
26 care is an option. Our findings reinforce previous research demonstrating the role of  
27  
28 socio-economic circumstances in determining older people's mental health. Poor social and  
29  
30 economic circumstances affect individuals' health throughout life.<sup>45-47</sup> The results from this  
31  
32 study also add to the evidence base with regard to inequalities in older people's mental health  
33  
34 related to levels of physical health<sup>48-51</sup> and different geographic areas, reflecting differences  
35  
36 in their social, political, economic arrangements and levels of public health services and  
37  
38 social protection.<sup>52</sup>  
39  
40  
41  
42  
43  
44  
45  
46  
47  
48

## 49 **LIMITATIONS**

50  
51  
52 The present study is limited by the cross-sectional design of the data. It is possible that older  
53  
54 people already had stress before the experience of abuse, and at the time of the interview  
55  
56 were more likely than others to recall past experiences such as abuse. The results could  
57  
58  
59  
60

1  
2  
3 benefit from repeated measures of psychological distress before and after abusive exposures.  
4  
5  
6 Another limitation is the self-report nature of the data. There is no validation by agencies  
7  
8 charged with investigating elder abuse. Due to social taboo, elder abuse might be  
9  
10 underreported; meantime, the interviewer might make an educated guess concerning the  
11  
12 presence or absence of physical, emotional and financial abuse or neglect by family members,  
13  
14 which may bias our results on the relationship between abuse and distress. Future surveys  
15  
16 need to develop appropriate screening and assessment tools to identify elder abuse.<sup>11</sup> Our  
17  
18 data also lack purposively designed scales measuring social support and personal coping  
19  
20 resources. Future research addressing these issues will improve our understanding of the  
21  
22 relationship between elder abuse, psychosocial resources, and psychological distress.  
23  
24  
25  
26  
27  
28

## 29 **CONCLUSION**

30  
31  
32 In conclusion, the findings presented in this paper demonstrate that 1) in the seven Indian  
33  
34 states represented in this research, elder abuse shows a negative association with the mental  
35  
36 health of older adults, especially among women; 2) household wealth generally has an  
37  
38 inverse relationship with mental health; 3) however, the negative association between elder  
39  
40 abuse and mental health is stronger among older people living in wealthy households.  
41  
42  
43  
44

45  
46 The number of older people in India is steadily growing.<sup>4</sup> Increased life expectancy brings  
47  
48 with it more chronic health problems and functional limitations that require long-term care.  
49  
50 Most older people continue to live in villages and to experience poor socioeconomic status  
51  
52 and are dependent upon their families for both financial and physical support. While the need  
53  
54 for care has grown, available resources have decreased. The lack of jobs close to where they  
55  
56  
57  
58  
59  
60

1  
2  
3  
4 live forces many young Indians to seek employment in urban areas. Such migration reduces  
5  
6 the number of available caregivers and increases the demands on non-migrant family  
7  
8 members to shoulder responsibility for elders' care. The costs of care were often high, due to  
9  
10 a lack of adequate public health care for older persons. Mistreatment of one's older parents  
11  
12 may also emanate from conflict over the control of family property. Researchers have begun  
13  
14 to argue that traditional Indian cultural values and the consequences of urbanization and  
15  
16 modernization influence the nature and scope of elder abuse.<sup>38</sup> In addition, recent research  
17  
18 has highlighted the increasing incidence of elder abuse due to property separation/division,  
19  
20 living conditions and the growing generation differences in thinking and attitude towards  
21  
22 expectations and lifestyles.<sup>53</sup> As India continues on its path of economic development, with  
23  
24 increasing urbanisation and spatial mobility, older people may be further exposed to abuse.  
25  
26  
27  
28  
29  
30

31  
32 At present, mental health in later life is not a priority area in many low income countries<sup>54</sup>  
33  
34 and how it is associated with elder abuse is neglected in both the research and policy arenas.  
35  
36 Intergenerational relations between older people and their adult children are pivotal in the  
37  
38 health and wellbeing of older people. However, such relations can have both positive and  
39  
40 negative impacts upon the mental wellbeing of both the older person and, in certain cases,  
41  
42 that of the adult child carer.<sup>55-56</sup> Elder abuse needs to be recognised as a key public health  
43  
44 issue, and appropriate strategies, policies and practices put in place. Reducing elder abuse  
45  
46 will have a positive impact on both the physical and mental health outcomes in later life.  
47  
48 Policy makers in India are faced with a major challenge in a low resource context, however  
49  
50 widening the public policy debate to include the recognition of the prevalence of elder abuse  
51  
52 and how best to address it within health policy planning would be a key move forward.  
53  
54  
55  
56  
57  
58  
59  
60



1  
2  
3 **Contributors** All authors Maria Evandrou, Jane Falkingham, Min Qin and Athina  
4 Vlachantoni contributed to conceptualising, writing, and editing this paper, and have read and  
5 approved the final manuscript. Data analysis was performed by Min Qin.  
6  
7

8 **Funding** The study was supported under the NWO-ESRC-ICSSR AgeGlobe Network  
9 (Indian-European research networking: Ageing and Well-being in a Globalising World; grant  
10 number ES/K005979/1).  
11

12  
13 **Competing interests** None declared.  
14  
15

16  
17 **Data sharing statement** No additional data are available.  
18  
19  
20  
21  
22  
23  
24  
25  
26  
27  
28  
29  
30  
31  
32  
33  
34  
35  
36  
37  
38  
39  
40  
41  
42  
43  
44  
45  
46  
47  
48  
49  
50  
51  
52  
53  
54  
55  
56  
57  
58  
59  
60

## References

- 1 United Nations, Department of Economic and Social Affairs, Population Division, World  
2  
3  
4  
5  
6  
7  
8  
9  
10  
11  
12  
13  
14  
15  
16  
17  
18  
19  
20  
21  
22  
23  
24  
25  
26  
27  
28  
29  
30  
31  
32  
33  
34  
35  
36  
37  
38  
39  
40  
41  
42  
43  
44  
45  
46  
47  
48  
49  
50  
51  
52  
53  
54  
55  
56  
57  
58  
59  
60  
Population Prospects: The 2015 Revision, Key Findings and Advance Tables.  
Working Paper No. ESA/P/WP.241, 2015.
- 2 Dhillon P, Ladusingh L, Agrawal G, Ageing and changing patterns in familial structure for  
older persons in India: a decomposition analysis. *Quality in Ageing and Older Adults*  
2016; 17: 83 – 96. doi: 10.1108/QAOA-10-2014-0024
- 3 Venkoba RA. Psychiatry of old age in India. *International Review of Psychiatry* 1993; 5:  
165–170.
- 4 Government of India. *Situation Analysis of the Elderly in India*. Central Statistics Office,  
Ministry of Statistics & Programme Implementation, 2011.  
[http://mospi.nic.in/mospi\\_new/upload/elderly\\_in\\_india.pdf](http://mospi.nic.in/mospi_new/upload/elderly_in_india.pdf) (accessed 14 Oct 2016)
- 5 Patel V, Prince M. Ageing and mental health in developing countries: who cares?  
Qualitative studies from Goa, India. *Psychological Medicine* 2001; 31: 29–38. PMID:  
11200957
- 6 Srivastava S, Bhatia MS, Rajoura OP, *et al.* Elder neglect in changing Indian scenario.  
*Delhi Psychiatry Journal* 2013; 16: 273–276.  
<http://medind.nic.in/daa/t13/i2/daat13i2p273.pdf>(accessed 17 Oct 2016)
- 7 World Health Organization (WHO). *A Global Response to Elder Abuse and Neglect:*  
*Building Primary Health Care Capacity to Deal with the Problem Worldwide: Main*  
*Report* (pp.1). Geneva: WHO, 2008.
- 8 Yon YJ, Mikton CR, Gassoumis ZD. *et al.*, Elder abuse prevalence in community settings:

- 1  
2  
3  
4 a systematic review and meta-analysis, *Lancet Glob Health* 2017;5: e147–56.  
5  
6  
7 9 Dong XQ., Elder abuse: systematic review and implications for practice, *J Am Geriatr Soc.*  
8  
9 2015;63(6):1214-38.  
10  
11 10 Pillemer K, Burnes D, Fiffin C, et al., Elder abuse: global situation, risk factors, and  
12  
13 prevention strategies, *Gerontologist* 2016; 56 (S2): S194–S205.  
14  
15  
16 11 Momtaz YA, Hamid TA, Ibrahim R. Theories and measures of elder abuse.  
17  
18 *Psychogeriatrics* 2013; 13: 182–188.  
19  
20  
21 12 Soneja S. *Elder Abuse in India* Country Report for World Health Organization.1999.  
22  
23 [http://www.who.int/ageing/projects/elder\\_abuse/alc\\_ea\\_ind.pdf](http://www.who.int/ageing/projects/elder_abuse/alc_ea_ind.pdf) (accessed 17 Oct  
24  
25 2016)  
26  
27  
28  
29 13 Skirbekk V, James KS. Abuse against elderly in India – the role of education. *BMC Public*  
30  
31 *Health* 2014; 14: 336. <http://www.biomedcentral.com/1471-2458/14/336>. (accessed  
32  
33 14 Oct 2016)  
34  
35  
36 14 Ohayashi H, Yamada S. *Psychological Distress Symptoms, Causes and Coping*. New  
37  
38 York: Nova Science Publishers, Inc. 2012  
39  
40  
41 15 Tyrer P, Steinberg D. *Models for Mental Disorder*. Chichester: John Wiley and Sons.  
42  
43 2013.  
44  
45  
46 16 Winterstein T, Eisikovits Z. The experience of loneliness of battered old women. *Journal*  
47  
48 *of Women & Aging* 2005; 17: 3–19. doi:10.1300/J074v17n04\_02  
49  
50  
51 17 Dyer CB, Pavlik VN, Murphy KP, et al. The high prevalence of depression and dementia  
52  
53 in elder abuse or neglect. *JAGS* 2000; 48: 205-208. PMID: 10682951  
54  
55  
56 18 Begle AM, Strachan M, Cisler JM, et al. Elder mistreatment and emotional symptoms  
57  
58  
59  
60

- 1  
2  
3  
4 among older adults in a largely rural population: the South Carolina elder  
5  
6 mistreatment study. *Journal of Interpersonal Violence* 2011; 26: 2321–2332. doi:  
7  
8  
9 10.1177/0886260510383037
- 10  
11 19 Selye H. Stress and disease. *Science* 1955; 122: 625–631. doi:  
12  
13 10.1126/science.122.3171.625
- 14  
15 20 Dong XQ, Simon MA, Beck TT, *et al.* Elder abuse and mortality: the role of  
16  
17 psychological and social wellbeing. *Gerontology* 2011; 57: 549–558. doi:  
18  
19 10.1159/000321881
- 20  
21 21 Luo Y, Waite LJ, Mistreatment and psychological well-being among older adults:  
22  
23 exploring the role of psychosocial resources and deficits. *J Gerontol B Psychol Sci*  
24  
25 *Soc Sci*, 2011; 66: 217–229. doi: 10.1093/geronb/gbq096
- 26  
27  
28  
29  
30  
31 22 Fisher BS, Regan SL, The extent and frequency of abuse in the lives of older women and  
32  
33 their relationship with health outcomes. *Gerontologist* 2006; 46: 200–209. doi:  
34  
35 10.1093/geront/46.2.200
- 36  
37  
38  
39 23 Cohen S, Wills TA. Stress, social support, and the buffering hypothesis. *Psychological*  
40  
41 *Bulletin* 1985; 98: 310–357.
- 42  
43  
44 24 Lazarus R S, Folkman S, *Stress, Appraisal and Coping*. New York: Springer, 1984.
- 45  
46 25 Pearlin LI, Schieman S, Fazio EM, *et al.* Stress, health, and the life course: Some  
47  
48 conceptual perspectives. *Journal of Health and Social Behavior* 2005; 46: 205–219.  
49  
50 doi:10.1177/002214650504600206
- 51  
52  
53  
54 26 Taylor SE, Stanton AL. Coping resources, coping processes, and mental health. *The*  
55  
56 *Annual Review of Clinical Psychology* 2007; 3: 377–401.  
57  
58  
59  
60

1  
2  
3  
4 doi:10.1146/annurev.clinpsy.3.022806.091520  
5

6 27 Comijs HC, Penninx BW, Knipscheer, KP, *et al.* Psychological distress in victims of elder  
7  
8 mistreatment: the effects of social support and coping. *J Gerontol B Psychol Sci Soc*  
9  
10  
11 *Sci*, 1999; 54: 240–245. PMID: 12382593  
12

13  
14 28 Alam M, James KS, Sathyanarayana KM, *et al.* *Report on the status of elderly in select*  
15  
16 *states of India, 2011*. New Delhi: United Nations Population Fund, 2012.  
17

18  
19 29 Goldberg DP, Gater R, Sartorius N, *et al.* The validity of two versions of the GHQ in the  
20  
21 WHO study of mental illness in general health care. *Psychological Medicine* 1997; 27:  
22  
23 191–197. doi: 10.1017/S0033291796004242  
24

25  
26 30 Shamasunder C, Srram TG, Murali RSG, *et al.* Validity of a short 5 - item version of the  
27  
28 General Health Questionnaire (GHQ). *Indian J Psychiatry* 1986; 28: 217–219.  
29  
30  
31 PMID: PMC3172533  
32

33  
34 31 Shivakumar P, Sadanand S, Bharath S, *et al.* Identifying psychological distress in elderly  
35  
36 seeking health care. *Indian J Public Health* 2015; 59: 18–23.  
37  
38  
39 doi:10.4103/0019-557X.152849  
40

41  
42 32 Gautam S, Nijhawan M, Kamal P, Standardisation of Hindi version of Goldberg's General  
43  
44 Health Questionnaire. *Indian J Psychiatry* 1987; 29: 63-66. PMID: 21927210  
45

46  
47 33 Kuruvilla A, Pothen M, Philip K, *et al.* The validation of the Tamil version of the 12 item  
48  
49 general health questionnaire. *Indian J Psychiatry* 1999; 41: 217–221. PMID:  
50  
51  
52 PMID2962995  
53

54  
55 34 Goldberg D, Oldehinkel T, Ormel J, Why GHQ threshold varies from one place to another.  
56  
57 *Psychological Medicine* 1998; 28: 915–921. PMID: 9723146  
58  
59  
60

- 1  
2  
3  
4 35 Pearlin LI, Schooler C. The structure of coping. *Journal of Health and Social Behavior*  
5  
6 1978; 22, 337–356. PMID: 649936  
7  
8  
9 36 Sherbourne CD, Stewart AL. The MOS social support survey. *Social Science & Medicine*  
10  
11 1991; 32: 713–714. PMID: 2035047  
12  
13  
14 37 Timmerman IGH, Emanuels-Zuurveen ES, Emmelkamp PMG. The Social Support  
15  
16 Inventory (SSI): A Brief Scale to Assess Perceived Adequacy of Social Support. *Clin*  
17  
18 *Psychol Psychother* 2000; 7: 401–410.  
19  
20 doi:10.1002/1099-0879(200011)7:5<401::AID-CPP253>3.0.CO;2-I  
21  
22  
23  
24 38 Lwya T, Doi T, Seichi A, et al. Characteristics of disability in activity of daily living in  
25  
26 elderly people associated with locomotive disorders. *BMC Geriatrics* 2017; 17:165.  
27  
28  
29 39 Martin P, Hagberg B, Poon LW. Predictors of loneliness in centenarians: A parallel study.  
30  
31 *J Cross Cult Gerontol* 1997; 12: 203–224. PMID: 14617927  
32  
33  
34 40 Tachè J, Selye H. On stress and coping mechanisms. *Issues in Mental Health Nursing*  
35  
36 1985; 7: 1–4, 3–24. doi: 10.3109/01612848509009447  
37  
38  
39 41 Chokkanathan, S. Resources, stressors and psychological distress among older adults in  
40  
41 Chennai, India. *Social Science & Medicine* 2009; 68: 243–250. doi:  
42  
43 10.1016/j.socscimed.2008.10.008  
44  
45  
46 42 Segal U. Family violence: a focus on India. *Aggression and Violent Behavior* 1999; 4:  
47  
48 213–231. doi:10.1016/S1359-1789(97)00051-7  
49  
50  
51 43 Nagpaul K. Elder abuse among Asian Indians: traditional versus modern perspectives.  
52  
53 *Journal of Elder Abuse & Neglect* 1998; 9: 77–92. doi: 10.1300/J084v09n02\_07  
54  
55  
56 44 Carter KN, Blakely T, Collings S, et al. What is the association between wealth and  
57  
58  
59  
60

- 1  
2  
3  
4 mental health? *J Epidemiol Community Health* 2008; 63: 221–226.  
5  
6 doi:10.1136/jech..079483  
7  
8  
9 45 WHO. *The Solid Facts: Social Determinants of Health*. Copenhagen: World Health  
10  
11 Organization Regional Office for Europe, 2003.  
12  
13  
14 46 Gallo LC, Matthews KA, Understanding the association between socioeconomic status  
15  
16 and physical health: do negative emotions play a role? *Psychological Bulletin* 2003;  
17  
18 129: 10–51. doi: 10.1037/0033-2909.129.1.10  
19  
20  
21 47 Jeon GS, Jang SN, Rhee SJ, *et al*. Gender differences in correlates of mental health among  
22  
23 elderly Koreans. *J Gerontol B Psychol Sci Soc Sci*, 2007; 62B, 5, S323–S329. PMID:  
24  
25 17906176  
26  
27  
28  
29 48 Ormel J, Kempen GIJM, Penninx BWJH, *et al*. Chronic medical conditions and mental  
30  
31 health in older people: disability and psychosocial resources mediate specific mental  
32  
33 health effects. *Psychological Medicine* 1997; 27: 1065 –1077. PMID: 9300512  
34  
35  
36 49 Joshi K, Kumar R, Avasthi A, Morbidity profile and its relationship with disability and  
37  
38 psychological distress among elderly people in Northern India. *Int J Epidemiol* 2003;  
39  
40 32: 978–987. PMID: 14681260  
41  
42  
43  
44 50 Shih M, Simon PA. Health-related quality of life among adults with serious psychological  
45  
46 distress and chronic medical conditions. *Qual Life Res* 2008; 17, 521–528.  
47  
48 doi:10.1007/s11136-008-9330-9  
49  
50  
51 51 Rajkumar AP, Thangadurai P, Senthilkumar P, *et al*. Nature, prevalence and factors  
52  
53 associated with depression among the elderly in a rural South Indian community.  
54  
55  
56 *International Psychogeriatrics* 2009; 21: 372–378. doi: 10.1017/S1041610209008527  
57  
58  
59  
60

- 1  
2  
3  
4 52 World Health Organization, Calouste Gulbenkian Foundation (WHO, CGF). *Social*  
5  
6 *Determinants of Mental Health*. Geneva: World Health Organization, 2014.  
7  
8  
9 53 Kumar Y, Bhargava A, Elder abuse in Indian families: problems and preventive actions.  
10  
11 *IJSRP* 2014; 4: 1–8. <http://www.ijsrp.org/research-paper-1014/ijsrp-p3498.pdf>  
12  
13 (accessed 14 Oct 2016)  
14  
15  
16 54 Patel V. Mental health in low- and middle-income countries. *British Medical Bulletin*  
17  
18 2007; 81 and 82, 81–96. doi: 10.1093/bmb/ldm010  
19  
20  
21 55 Stone J, Evandrou M, Falkingham J. The transition to living alone and psychological  
22  
23 distress in later life. *Age and Ageing* 2013; 42: 366–372. doi:10.1093/ageing/aft006.  
24  
25  
26 56 Vlachantoni A, Robards J, Falkingham J *et al*. Trajectories of informal care and health.  
27  
28 *SSM -Population Health* 2016; 2: 495–501. doi:10.1016/j.ssmph.2016.05.009  
29  
30  
31  
32  
33  
34  
35  
36  
37  
38  
39  
40  
41  
42  
43  
44  
45  
46  
47  
48  
49  
50  
51  
52  
53  
54  
55  
56  
57  
58  
59  
60



Table 1. Distribution of GHQ-12  $\geq 4$  (unweighted data)

| Variables                                                     | Distribution (%) | Number of respondents | % of GHQ-12 score $\geq 4$ | P value (Pearson Chi square test) |
|---------------------------------------------------------------|------------------|-----------------------|----------------------------|-----------------------------------|
| <b>Total</b>                                                  | 100.0            | 9,589                 | 40.6                       |                                   |
| <b>Experience abuse last month</b>                            |                  |                       |                            |                                   |
| No                                                            | 95.5             | 9,157                 | 39.7                       | .000                              |
| Yes                                                           | 4.5              | 432                   | 61.6                       |                                   |
| <b>Selected psychosocial and material resources variables</b> |                  |                       |                            |                                   |
| <b>Marital status</b>                                         |                  |                       |                            |                                   |
| Widowed                                                       | 40.5             | 5,710                 | 48.0                       | .000                              |
| Currently married/living together                             | 59.5             | 3,879                 | 35.7                       |                                   |
| <b>Social activities</b>                                      |                  |                       |                            |                                   |
| No listed social activity                                     | 19.4             | 1,860                 | 55.8                       | .000                              |
| Have social activity                                          | 80.6             | 7,729                 | 37.0                       |                                   |
| <b>Have someone trust or confide</b>                          |                  |                       |                            |                                   |
| No                                                            | 17.1             | 1,642                 | 59.7                       | .000                              |
| Yes                                                           | 82.9             | 7,947                 | 36.7                       |                                   |
| <b>Feel able to manage situations</b>                         |                  |                       |                            |                                   |
| Hardly ever                                                   | 24.0             | 2,298                 | 76.3                       | .000                              |
| Sometimes                                                     | 63.2             | 6,057                 | 32.8                       |                                   |
| Most of the time                                              | 12.9             | 1,234                 | 12.9                       |                                   |
| <b>Financial dependency</b>                                   |                  |                       |                            | .000                              |
| No dependency                                                 | 25.3             | 2,427                 | 25.2                       |                                   |
| Partial dependency                                            | 24.6             | 2,357                 | 40.9                       |                                   |
| Full dependency                                               | 50.1             | 4,805                 | 48.3                       |                                   |
| <b>Household wealth index</b>                                 |                  |                       |                            | .000                              |
| Lowest                                                        | 20.0             | 1,915                 | 64.1                       |                                   |
| Second                                                        | 20.4             | 1,958                 | 48.4                       |                                   |
| Middle                                                        | 19.6             | 1,884                 | 40.4                       |                                   |
| Fourth                                                        | 19.8             | 1,901                 | 28.8                       |                                   |
| Highest                                                       | 20.1             | 1,931                 | 21.4                       |                                   |
| <b>Other control variables</b>                                |                  |                       |                            |                                   |
| <b>age</b>                                                    |                  |                       |                            |                                   |
| 60-69                                                         | 63.4             | 6,082                 | 35.6                       | .000                              |
| 70-79                                                         | 26.4             | 2,533                 | 46.9                       |                                   |
| 80+                                                           | 10.2             | 974                   | 55.9                       |                                   |
| <b>Gender</b>                                                 |                  |                       |                            |                                   |
| Men                                                           | 47.4             | 4,543                 | 36.2                       | .000                              |
| Women                                                         | 52.6             | 5,046                 | 44.7                       |                                   |
| <b>Education</b>                                              |                  |                       |                            | .000                              |
| None                                                          | 46.1             | 4,422                 | 52.1                       |                                   |
| 1-4 years                                                     | 12.9             | 1,241                 | 45.2                       |                                   |
| 5-7 years                                                     | 13.5             | 1,297                 | 36.9                       |                                   |
| 8+ years                                                      | 27.4             | 2,629                 | 21.0                       |                                   |
| <b>Caste</b>                                                  |                  |                       |                            | .000                              |
| Scheduled Tribe/Scheduled Caste                               | 24.2             | 2,316                 | 47.4                       |                                   |
| Other Backward Caste                                          | 34.1             | 3,274                 | 42.9                       |                                   |
| Others                                                        | 39.1             | 3,753                 | 33.4                       |                                   |
| Unknown                                                       | 2.6              | 246                   | 58.5                       |                                   |
| <b>Working status</b>                                         |                  |                       |                            |                                   |
| Has never worked                                              | 36.2             | 3,472                 | 41.2                       | .000                              |
| Has ever worked but not now                                   | 40.7             | 3,904                 | 42.6                       |                                   |
| Has ever worked and is now working                            | 23.1             | 2,213                 | 36.2                       |                                   |
| <b>Self-reported health</b>                                   |                  |                       |                            | .000                              |
| Excellent /Very good                                          | 16.2             | 1,557                 | 19.1                       |                                   |
| Good                                                          | 30.0             | 2,875                 | 28.1                       |                                   |
| Fair                                                          | 36.5             | 3,499                 | 48.7                       |                                   |
| Poor                                                          | 17.3             | 1,658                 | 65.6                       |                                   |
| <b>Chronic disease</b>                                        |                  |                       |                            | .000                              |
| No                                                            | 35.3             | 3,389                 | 35.3                       |                                   |
| 1 type                                                        | 32.2             | 3,087                 | 41.7                       |                                   |
| 2 more types                                                  | 32.5             | 3,113                 | 45.4                       |                                   |
| <b>Difficulty with ADLs</b>                                   |                  |                       |                            | .000                              |
| No need for assistance                                        | 92.7             | 8,890                 | 38.1                       |                                   |
| Light need                                                    | 3.8              | 369                   | 67.8                       |                                   |
| Heavy need                                                    | 3.4              | 330                   | 79.1                       |                                   |
| <b>Disability</b>                                             |                  |                       |                            | .000                              |
| No disability                                                 | 27.2             | 2,606                 | 25.1                       |                                   |
| Light                                                         | 44.7             | 4,285                 | 37.6                       |                                   |

| Variables                 | Distribution (%) | Number of respondents | % of GHQ-12 score $\geq 4$ | P value (Pearson Chi square test) |
|---------------------------|------------------|-----------------------|----------------------------|-----------------------------------|
| Medium                    | 18.6             | 1,788                 | 54.5                       |                                   |
| Heavy                     | 9.5              | 910                   | 72.0                       |                                   |
| <b>Living arrangement</b> |                  |                       |                            |                                   |
| Alone                     | 6.3              | 605                   | 50.9                       | .000                              |
| Spouse only               | 14.9             | 1,432                 | 34.9                       |                                   |
| At least one child        | 71.3             | 6,833                 | 40.5                       |                                   |
| Others                    | 7.5              | 719                   | 44.6                       |                                   |
| <b>Residence</b>          |                  |                       |                            |                                   |
| Rural                     | 52.2             | 5,001                 | 45.7                       | .000                              |
| Urban                     | 47.8             | 4,588                 | 35.1                       |                                   |
| <b>State</b>              |                  |                       |                            |                                   |
| Himachal Pradesh          | 15.0             | 1,440                 | 23.5                       | .000                              |
| Punjab                    | 13.1             | 1,255                 | 20.8                       |                                   |
| West Bengal               | 13.2             | 1,263                 | 60.5                       |                                   |
| Odisha                    | 15.3             | 1,467                 | 55.5                       |                                   |
| Maharashtra               | 14.6             | 1,399                 | 44.3                       |                                   |
| Kerala                    | 14.0             | 1,341                 | 28.0                       |                                   |
| Tamil Nadu                | 14.9             | 1,424                 | 50.8                       |                                   |

Source: Authors' analysis of UNFPA Building Knowledge Base on Ageing in India 2011 survey

Table 2. Odds ratios for GHQ-12 score  $\geq 4$  (N=9,589)

| Variables                                               | Total                  |                        |                        | Men                    |                        |                        | Women                  |                        |                        |
|---------------------------------------------------------|------------------------|------------------------|------------------------|------------------------|------------------------|------------------------|------------------------|------------------------|------------------------|
|                                                         | Model 1                | Model 2                | Model 3                | Model 1                | Model 2                | Model 3                | Model 1                | Model 2                | Model 3                |
| <i>Experienced abuse in last month</i> No (ref)         |                        |                        |                        |                        |                        |                        |                        |                        |                        |
| Yes                                                     | 2.44***<br>(2.00–2.97) | 1.60***<br>(1.22–2.09) | 1.12<br>(0.53–2.36)    | 2.14***<br>(1.58–2.90) | 1.42<br>(0.93–2.16)    | 0.84<br>(0.22–3.16)    | 2.60***<br>(2.00–3.39) | 1.76**<br>(1.23–2.50)  | 1.33<br>(0.52–3.38)    |
| <b>Psychosocial and material resources</b>              |                        |                        |                        |                        |                        |                        |                        |                        |                        |
| <i>Marital status</i> Widowed (ref)                     |                        |                        |                        |                        |                        |                        |                        |                        |                        |
| Currently married/living together                       |                        | 1.12<br>(0.98–1.28)    | 1.12<br>(0.98–1.28)    |                        | 1.29*<br>(1.02–1.63)   | 1.30<br>(1.03–1.64)    |                        | 1.06<br>(0.89–1.27)    | 1.07<br>(0.90–1.27)    |
| <i>Social activities participation</i> No (ref)         |                        |                        |                        |                        |                        |                        |                        |                        |                        |
| Yes                                                     |                        | 0.85*<br>(0.74–0.98)   | 0.85*<br>(0.74–0.97)   |                        | 1.03<br>(0.83–1.30)    | 1.04<br>(0.83–1.30)    |                        | 0.77**<br>(0.65–0.91)  | 0.76**<br>(0.63–0.90)  |
| <i>Have someone trust or confide</i> No (ref)           |                        |                        |                        |                        |                        |                        |                        |                        |                        |
| Yes                                                     |                        | 0.69***<br>(0.60–0.80) | 0.70***<br>(0.60–0.81) |                        | 0.65***<br>(0.52–0.82) | 0.67***<br>(0.53–0.84) |                        | 0.71***<br>(0.59–0.86) | 0.71***<br>(0.58–0.86) |
| <i>Feel able to manage situations</i> Hardly ever (ref) |                        |                        |                        |                        |                        |                        |                        |                        |                        |
| Sometimes                                               |                        | 0.25***<br>(0.22–0.28) | 0.25***<br>(0.22–0.28) |                        | 0.25***<br>(0.21–0.31) | 0.25***<br>(0.21–0.31) |                        | 0.24***<br>(0.20–0.28) | 0.24***<br>(0.20–0.28) |
| Most of the time                                        |                        | 0.12***<br>(0.09–0.15) | 0.12***<br>(0.09–0.15) |                        | 0.12***<br>(0.09–0.16) | 0.11***<br>(0.08–0.16) |                        | 0.11***<br>(0.08–0.15) | 0.12***<br>(0.09–0.16) |
| <i>Financial dependency</i> No dependency (ref)         |                        |                        |                        |                        |                        |                        |                        |                        |                        |
| Partial dependency                                      |                        | 1.07<br>(0.91–1.25)    | 1.08<br>(0.92–1.26)    |                        | 1.05<br>(0.86–1.29)    | 1.06<br>(0.86–1.30)    |                        | 1.03<br>(0.80–1.33)    | 1.04<br>(0.81–1.35)    |
| Full dependency                                         |                        | 1.31***<br>(1.12–1.53) | 1.31**<br>(1.12–1.53)  |                        | 1.57***<br>(1.26–1.95) | 1.58***<br>(1.26–1.97) |                        | 1.11<br>(0.88–1.40)    | 1.12<br>(0.89–1.42)    |
| <i>Household wealth index</i> Lowest (ref)              |                        |                        |                        |                        |                        |                        |                        |                        |                        |
| Second                                                  |                        | 0.83*<br>(0.70–0.97)   | 0.80*<br>(0.68–0.95)   |                        | 0.77*<br>(0.61–0.99)   | 0.74*<br>(0.58–0.96)   |                        | 0.88<br>(0.70–1.10)    | 0.86<br>(0.68–1.08)    |
| Middle                                                  |                        | 0.78**<br>(0.65–0.94)  | 0.73***<br>(0.61–0.88) |                        | 0.97<br>(0.74–1.27)    | 0.90<br>(0.68–1.19)    |                        | 0.68**<br>(0.53–0.87)  | 0.64***<br>(0.49–0.82) |
| Fourth                                                  |                        | 0.62***<br>(0.51–0.76) | 0.57***<br>(0.47–0.70) |                        | 0.65**<br>(0.48–0.87)  | 0.60***<br>(0.45–0.82) |                        | 0.63***<br>(0.48–0.83) | 0.57***<br>(0.43–0.76) |
| Highest                                                 |                        | 0.54***<br>(0.43–0.67) | 0.50***<br>(0.39–0.62) |                        | 0.54***<br>(0.38–0.76) | 0.51***<br>(0.36–0.72) |                        | 0.57***<br>(0.42–0.78) | 0.52***<br>(0.38–0.71) |
| <b>Other control variables</b>                          |                        |                        |                        |                        |                        |                        |                        |                        |                        |
| <i>Age</i> 60-69 (ref)                                  |                        |                        |                        |                        |                        |                        |                        |                        |                        |
| 70-79                                                   |                        | 1.20**<br>(1.06–1.36)  | 1.20**<br>(1.06–1.36)  |                        | 1.14<br>(0.95–1.38)    | 1.14<br>(0.95–1.38)    |                        | 1.25*<br>(1.06–1.48)   | 1.26**<br>(1.06–1.49)  |
| 80+                                                     |                        | 1.24*<br>(1.06–1.36)   | 1.25*<br>(1.06–1.36)   |                        | 1.11<br>(0.95–1.38)    | 1.13<br>(0.95–1.38)    |                        | 1.31*<br>(1.06–1.48)   | 1.32*<br>(1.06–1.49)   |

| Variables                                                  | Total   |             |             | Men     |             |             | Women   |             |             |
|------------------------------------------------------------|---------|-------------|-------------|---------|-------------|-------------|---------|-------------|-------------|
|                                                            | Model 1 | Model 2     | Model 3     | Model 1 | Model 2     | Model 3     | Model 1 | Model 2     | Model 3     |
| <b>Gender</b> Men (ref)                                    |         | (1.03–1.50) | (1.04–1.51) |         | (0.83–1.48) | (0.84–1.51) |         | (1.02–1.69) | (1.03–1.70) |
| Women                                                      | 1.12    |             | 1.14        |         |             |             |         |             |             |
|                                                            |         | (0.95–1.32) | (0.97–1.34) |         |             |             |         |             |             |
| <b>Education</b> No schooling (ref)                        |         |             |             |         |             |             |         |             |             |
| 1-4 years                                                  | 0.88    |             | 0.88        | 0.84    |             | 0.84        | 0.88    |             | 0.88        |
|                                                            |         | (0.75–1.04) | (0.76–1.04) |         | (0.66–1.08) | (0.66–1.08) |         | (0.70–1.09) | (0.71–1.10) |
| 5-7 years                                                  | 0.86    |             | 0.86        | 0.87    |             | 0.87        | 0.84    |             | 0.85        |
|                                                            |         | (0.73–1.01) | (0.73–1.01) |         | (0.69–1.11) | (0.69–1.11) |         | (0.67–1.06) | (0.68–1.08) |
| 8+ years                                                   | 0.59*** |             | 0.60***     | 0.52*** |             | 0.53***     | 0.64*** |             | 0.66***     |
|                                                            |         | (0.50–0.69) | (0.51–0.71) |         | (0.42–0.66) | (0.42–0.67) |         | (0.50–0.83) | (0.51–0.85) |
| <b>Caste</b> Scheduled Tribe/Scheduled Caste (ref)         |         |             |             |         |             |             |         |             |             |
| Other Backward Caste                                       | 0.91    |             | 0.91        | 0.99    |             | 0.99        | 0.86    |             | 0.86        |
|                                                            |         | (0.79–1.06) | (0.79–1.06) |         | (0.80–1.23) | (0.79–1.23) |         | (0.70–1.05) | (0.70–1.05) |
| Others                                                     | 1.05    |             | 1.06        | 1.06    |             | 1.06        | 1.05    |             | 1.06        |
|                                                            |         | (0.91–1.21) | (0.92–1.22) |         | (0.85–1.31) | (0.86–1.32) |         | (0.87–1.28) | (0.87–1.29) |
| Unknown                                                    | 1.09    |             | 1.08        | 1.23    |             | 1.22        | 1.03    |             | 1.03        |
|                                                            |         | (0.78–1.53) | (0.77–1.52) |         | (0.72–2.09) | (0.72–2.08) |         | (0.65–1.61) | (0.65–1.62) |
| <b>Working status</b> Not work (ref)                       |         |             |             |         |             |             |         |             |             |
| Ever work but not now                                      | 1.21*   |             | 1.23*       | 1.20    |             | 1.20        | 1.20    |             | 1.22*       |
|                                                            |         | (1.02–1.42) | (1.04–1.45) |         | (0.59–2.45) | (0.59–2.46) |         | (0.99–1.46) | (1.01–1.49) |
| Ever work and now                                          | 1.17    |             | 1.19        | 1.16    |             | 1.15        | 1.11    |             | 1.16        |
|                                                            |         | (0.96–1.42) | (0.97–1.45) |         | (0.56–2.41) | (0.55–2.40) |         | (0.85–1.45) | (0.89–1.51) |
| <b>Self-reported health</b> Excellent/very good/good (ref) |         |             |             |         |             |             |         |             |             |
| Fair                                                       | 2.09*** |             | 2.09***     | 2.10*** |             | 2.10***     | 2.08*** |             | 2.09***     |
|                                                            |         | (1.85–2.35) | (1.86–2.36) |         | (1.76–2.51) | (1.76–2.51) |         | (1.77–2.45) | (1.78–2.46) |
| Poor                                                       | 3.83*** |             | 3.84***     | 4.56*** |             | 4.55***     | 3.47*** |             | 3.50***     |
|                                                            |         | (3.24–4.52) | (3.25–4.54) |         | (3.50–5.94) | (3.49–5.93) |         | (2.78–4.33) | (2.80–4.36) |
| <b>Chronic disease</b> No (ref)                            |         |             |             |         |             |             |         |             |             |
| One type                                                   | 1.17*   |             | 1.17*       | 1.29*   |             | 1.29*       | 1.11    |             | 1.11        |
|                                                            |         | (1.03–1.34) | (1.03–1.34) |         | (1.06–1.58) | (1.06–1.57) |         | (0.93–1.32) | (0.93–1.32) |
| More than one types                                        | 1.31*** |             | 1.31***     | 1.43**  |             | 1.44***     | 1.23*   |             | 1.23*       |
|                                                            |         | (1.13–1.51) | (1.13–1.51) |         | (1.14–1.78) | (1.15–1.80) |         | (1.01–1.49) | (1.01–1.49) |
| <b>Difficulty with ADLs</b> No need for assistance (ref)   |         |             |             |         |             |             |         |             |             |
| Light need                                                 | 1.21    |             | 1.22        | 0.85    |             | 0.85        | 1.52*   |             | 1.53*       |
|                                                            |         | (0.92–1.60) | (0.93–1.61) |         | (0.55–1.31) | (0.55–1.31) |         | (1.06–2.19) | (1.06–2.20) |
| Heavy need                                                 | 1.83*** |             | 1.84***     | 2.75*** |             | 2.79***     | 1.44    |             | 1.46        |
|                                                            |         | (1.31–2.56) | (1.32–2.58) |         | (1.51–5.00) | (1.54–5.08) |         | (0.95–2.19) | (0.96–2.21) |
| <b>Disability</b> No disability (ref)                      |         |             |             |         |             |             |         |             |             |
| Light                                                      | 1.55*** |             | 1.54***     | 1.27*   |             | 1.25*       | 1.79*** |             | 1.79***     |

1  
2  
3  
4  
5  
6  
7  
8  
9  
10  
11  
12  
13  
14  
15  
16  
17  
18  
19  
20  
21  
22  
23  
24  
25  
26  
27  
28  
29  
30  
31  
32  
33  
34  
35  
36  
37  
38  
39  
40  
41  
42  
43  
44  
45  
46  
47  
48  
49

| Variables                             | Total   |             |              | Men     |             |              | Women   |             |              |
|---------------------------------------|---------|-------------|--------------|---------|-------------|--------------|---------|-------------|--------------|
|                                       | Model 1 | Model 2     | Model 3      | Model 1 | Model 2     | Model 3      | Model 1 | Model 2     | Model 3      |
|                                       |         | (1.35–1.78) | (1.34–1.77)  |         | (1.03–1.56) | (1.02–1.54)  |         | (1.49–2.16) | (1.48–2.16)  |
| Medium                                |         | 2.23***     | 2.22***      |         | 1.81***     | 1.79***      |         | 2.56***     | 2.57***      |
|                                       |         | (1.87–2.65) | (1.87–2.64)  |         | (1.39–2.36) | (1.37–2.34)  |         | (2.03–3.23) | (2.03–3.24)  |
| Heavy                                 |         | 3.39***     | 3.38***      |         | 2.69***     | 2.67***      |         | 4.01***     | 4.03***      |
|                                       |         | (2.71–4.25) | (2.70–4.23)  |         | (1.92–3.77) | (1.90–3.75)  |         | (2.95–5.44) | (2.96–5.48)  |
| <b>Living arrangement</b> Alone (ref) |         |             |              |         |             |              |         |             |              |
| Spouse only                           |         | 0.78        | 0.78         |         | 0.65        | 0.66         |         | 0.82        | 0.81         |
|                                       |         | (0.60–1.03) | (0.59–1.03)  |         | (0.37–1.13) | (0.38–1.16)  |         | (0.57–1.17) | (0.57–1.17)  |
| At least one child                    |         | 1.10        | 1.10         |         | 0.91        | 0.93         |         | 1.14        | 1.14         |
|                                       |         | (0.87–1.40) | (0.86–1.39)  |         | (0.53–1.56) | (0.54–1.59)  |         | (0.86–1.50) | (0.86–1.50)  |
| Others                                |         | 1.20        | 1.19         |         | 1.20        | 1.22         |         | 1.13        | 1.13         |
|                                       |         | (0.89–1.61) | (0.89–1.60)  |         | (0.66–2.20) | (0.67–2.24)  |         | (0.79–1.60) | (0.79–1.60)  |
| <b>Residence</b> Rural (ref)          |         |             |              |         |             |              |         |             |              |
| Urban                                 |         | 0.90        | 0.90         |         | 0.77**      | 0.76**       |         | 0.99        | 0.99         |
|                                       |         | (0.80–1.01) | (0.80–1.01)  |         | (0.64–0.91) | (0.64–0.91)  |         | (0.85–1.15) | (0.84–1.15)  |
| <b>State</b> Himachal Pradesh (ref)   |         |             |              |         |             |              |         |             |              |
| Punjab                                |         | 0.60***     | 0.60***      |         | 0.61**      | 0.62**       |         | 0.56***     | 0.56***      |
|                                       |         | (0.48–0.74) | (0.48–0.75)  |         | (0.43–0.86) | (0.44–0.87)  |         | (0.42–0.75) | (0.42–0.75)  |
| West Bengal                           |         | 2.63***     | 2.60***      |         | 4.23***     | 4.25***      |         | 1.78***     | 1.74***      |
|                                       |         | (2.13–3.25) | (2.10–3.21)  |         | (3.06–5.85) | (3.07–5.88)  |         | (1.34–2.38) | (1.30–2.33)  |
| Odisha                                |         | 2.82***     | 2.78***      |         | 3.27***     | 3.28***      |         | 2.65***     | 2.58***      |
|                                       |         | (2.28–3.49) | (2.24–3.44)  |         | (2.37–4.50) | (2.37–4.53)  |         | (1.98–3.56) | (1.92–3.47)  |
| Maharashtra                           |         | 1.69***     | 1.67***      |         | 2.16***     | 2.17***      |         | 1.37*       | 1.34         |
|                                       |         | (1.36–2.10) | (1.35–2.08)  |         | (1.56–2.98) | (1.57–2.99)  |         | (1.01–1.85) | (0.99–1.81)  |
| Kerala                                |         | 0.96        | 0.95         |         | 0.72        | 0.73         |         | 1.05        | 1.03         |
|                                       |         | (0.76–1.20) | (0.76–1.20)  |         | (0.50–1.04) | (0.50–1.05)  |         | (0.78–1.41) | (0.77–1.40)  |
| Tamil Nadu                            |         | 3.81***     | 3.75***      |         | 4.63***     | 4.62***      |         | 3.17***     | 3.07***      |
|                                       |         | (3.01–4.81) | (2.97–4.74)  |         | (3.24–6.59) | (3.24–6.60)  |         | (2.31–4.36) | (2.23–4.23)  |
| Abuse* Second quintile                |         |             | 1.38         |         |             | 1.79         |         |             | 1.32         |
|                                       |         |             | (0.75–2.55)  |         |             | (0.68–4.72)  |         |             | (0.59–2.95)  |
| Abuse * Middle quintile               |         |             | 2.90**       |         |             | 3.83*        |         |             | 2.72         |
|                                       |         |             | (1.30–6.44)  |         |             | (1.07–13.69) |         |             | (0.93–7.91)  |
| Abuse * Fourth quintile               |         |             | 4.31***      |         |             | 3.36         |         |             | 5.93**       |
|                                       |         |             | (1.87–9.92)  |         |             | (0.93–12.18) |         |             | (1.87–18.81) |
| Abuse * Highest quintile              |         |             | 4.47**       |         |             | 3.45         |         |             | 5.61*        |
|                                       |         |             | (1.67–11.98) |         |             | (0.76–15.74) |         |             | (1.40–22.50) |
| Abuse * High education                |         |             | 0.74         |         |             | 0.65         |         |             | 0.78         |
|                                       |         |             | (0.32–1.70)  |         |             | (0.22–1.89)  |         |             | (0.17–3.51)  |
| Abuse * Have someone to trust         |         |             | 0.87         |         |             | 0.72         |         |             | 0.90         |
|                                       |         |             | (0.44–1.71)  |         |             | (0.22–1.89)  |         |             | (0.38–2.15)  |

| Variables                                        | Total   |         |                     | Men     |         |                     | Women   |         |                     |
|--------------------------------------------------|---------|---------|---------------------|---------|---------|---------------------|---------|---------|---------------------|
|                                                  | Model 1 | Model 2 | Model 3             | Model 1 | Model 2 | Model 3             | Model 1 | Model 2 | Model 3             |
| Abuse * Feel able to manage situations some time |         |         | 0.92<br>(0.54–1.58) |         |         | 1.26<br>(0.53–2.98) |         |         | 0.80<br>(0.39–1.60) |
| Abuse * Feel able to manage situations most time |         |         | 1.04<br>(0.42–2.54) |         |         | 2.43<br>(0.75–7.90) |         |         | 0.41<br>(0.10–1.78) |
| <b>Constant</b>                                  | 0.66*** | 0.60*   | 0.61*               | 0.55*** | 0.51    | 0.52                | 0.77*** | 0.84    | 0.88                |
| <b>Cox &amp; Snell R<sup>2</sup></b>             | 0.008   | 0.327   | 0.328               | 0.005   | 0.341   | 0.342               | 0.011   | 0.317   | 0.319               |
| <b>Nagelkerke R<sup>2</sup></b>                  | 0.011   | 0.441   | 0.442               | 0.007   | 0.467   | 0.469               | 0.014   | 0.424   | 0.427               |

Source: Authors' analysis of UNFPA Building Knowledge Base on Ageing in India 2011 survey

\*\*\*p<0.001, \*\*p<0.01, \*p<0.05

Values in the brackets are 95% Confidence intervals

1  
2  
3  
4  
5  
6  
7  
8  
9  
10  
11  
12  
13  
14  
15  
16  
17  
18  
19  
20  
21  
22  
23  
24  
25  
26  
27  
28  
29  
30  
31  
32  
33  
34  
35  
36  
37  
38  
39  
40  
41  
42  
43  
44  
45  
46  
47  
48  
49  
50  
51  
52  
53  
54  
55  
56  
57  
58  
59  
60

Figure 1. Predicted probability of GHQ-12 $\geq$ 4 among older adults by elder abuse and household wealth quintile index.

Source: Authors' analysis of UNFPA Building Knowledge Base on Ageing in India 2011 survey

For peer review only

1  
2  
3  
4  
5  
6  
7  
8  
9  
10  
11  
12  
13  
14  
15  
16  
17  
18  
19  
20  
21  
22  
23  
24  
25  
26  
27  
28  
29  
30  
31  
32  
33  
34  
35  
36  
37  
38  
39  
40  
41  
42  
43  
44  
45  
46  
47  
48  
49  
50  
51  
52  
53  
54  
55  
56  
57  
58  
59  
60

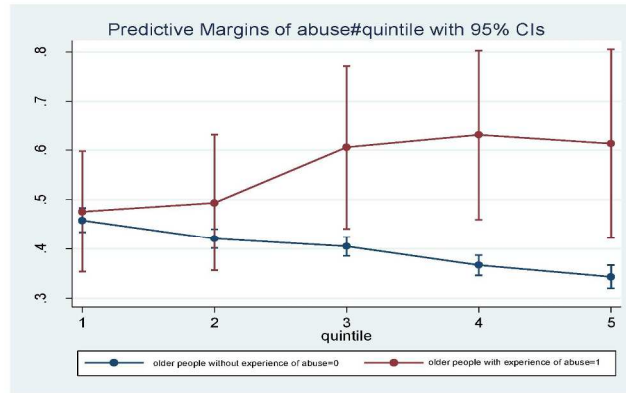

Figure 1. Predicted probability of GHQ-12 >= 4 among older adults by elder abuse and household wealth quintile

Source: Authors' analysis of UNFPA Building Knowledge Base on Ageing in India 2011 survey

210x297mm (300 x 300 DPI)



STROBE 2007 (v4) Statement—Checklist of items that should be included in reports of cross-sectional studies

| Section/Topic             | Item # | Recommendation                                                                                                                                                                       | Reported on page # |
|---------------------------|--------|--------------------------------------------------------------------------------------------------------------------------------------------------------------------------------------|--------------------|
| Title and abstract        | 1      | (a) Indicate the study’s design with a commonly used term in the title or the abstract                                                                                               | 1                  |
|                           |        | (b) Provide in the abstract an informative and balanced summary of what was done and what was found                                                                                  | 2,3                |
| <b>Introduction</b>       |        |                                                                                                                                                                                      |                    |
| Background/rationale      | 2      | Explain the scientific background and rationale for the investigation being reported                                                                                                 | 4,5,6              |
| Objectives                | 3      | State specific objectives, including any prespecified hypotheses                                                                                                                     | 7,8                |
| <b>Methods</b>            |        |                                                                                                                                                                                      |                    |
| Study design              | 4      | Present key elements of study design early in the paper                                                                                                                              | 8                  |
| Setting                   | 5      | Describe the setting, locations, and relevant dates, including periods of recruitment, exposure, follow-up, and data collection                                                      | 8                  |
| Participants              | 6      | (a) Give the eligibility criteria, and the sources and methods of selection of participants                                                                                          | 8,9                |
| Variables                 | 7      | Clearly define all outcomes, exposures, predictors, potential confounders, and effect modifiers. Give diagnostic criteria, if applicable                                             | 9,10,11,12,13      |
| Data sources/ measurement | 8*     | For each variable of interest, give sources of data and details of methods of assessment (measurement). Describe comparability of assessment methods if there is more than one group | 9,10,11,12,13      |
| Bias                      | 9      | Describe any efforts to address potential sources of bias                                                                                                                            | 20,21              |
| Study size                | 10     | Explain how the study size was arrived at                                                                                                                                            | 9                  |
| Quantitative variables    | 11     | Explain how quantitative variables were handled in the analyses. If applicable, describe which groupings were chosen and why                                                         | 9,10,11,12,13      |
| Statistical methods       | 12     | (a) Describe all statistical methods, including those used to control for confounding                                                                                                | 14                 |
|                           |        | (b) Describe any methods used to examine subgroups and interactions                                                                                                                  | 14                 |
|                           |        | (c) Explain how missing data were addressed                                                                                                                                          | 9                  |
|                           |        | (d) If applicable, describe analytical methods taking account of sampling strategy                                                                                                   | -                  |
|                           |        | (e) Describe any sensitivity analyses                                                                                                                                                | -                  |
| <b>Results</b>            |        |                                                                                                                                                                                      |                    |

1  
2  
3  
4  
5  
6  
7  
8  
9  
10  
11  
12  
13  
14  
15  
16  
17  
18  
19  
20  
21  
22  
23  
24  
25  
26  
27  
28  
29  
30  
31  
32  
33  
34  
35  
36  
37  
38  
39  
40  
41  
42  
43  
44  
45  
46  
47  
48  
49

|                          |     |                                                                                                                                                                                                              |          |
|--------------------------|-----|--------------------------------------------------------------------------------------------------------------------------------------------------------------------------------------------------------------|----------|
| Participants             | 13* | (a) Report numbers of individuals at each stage of study—eg numbers potentially eligible, examined for eligibility, confirmed eligible, included in the study, completing follow-up, and analysed            | 15       |
|                          |     | (b) Give reasons for non-participation at each stage                                                                                                                                                         | -        |
|                          |     | (c) Consider use of a flow diagram                                                                                                                                                                           | -        |
| Descriptive data         | 14* | (a) Give characteristics of study participants (eg demographic, clinical, social) and information on exposures and potential confounders                                                                     | 15,16    |
|                          |     | (b) Indicate number of participants with missing data for each variable of interest                                                                                                                          | 9        |
| Outcome data             | 15* | Report numbers of outcome events or summary measures                                                                                                                                                         | 15       |
| Main results             | 16  | (a) Give unadjusted estimates and, if applicable, confounder-adjusted estimates and their precision (eg, 95% confidence interval). Make clear which confounders were adjusted for and why they were included | 16,17,18 |
|                          |     | (b) Report category boundaries when continuous variables were categorized                                                                                                                                    | 31,33,34 |
|                          |     | (c) If relevant, consider translating estimates of relative risk into absolute risk for a meaningful time period                                                                                             | -        |
| Other analyses           | 17  | Report other analyses done—eg analyses of subgroups and interactions, and sensitivity analyses                                                                                                               | 17,18    |
| <b>Discussion</b>        |     |                                                                                                                                                                                                              |          |
| Key results              | 18  | Summarise key results with reference to study objectives                                                                                                                                                     | 18,19,20 |
| Limitations              | 19  | Discuss limitations of the study, taking into account sources of potential bias or imprecision. Discuss both direction and magnitude of any potential bias                                                   | 20,21    |
| Interpretation           | 20  | Give a cautious overall interpretation of results considering objectives, limitations, multiplicity of analyses, results from similar studies, and other relevant evidence                                   | 18,19,20 |
| Generalisability         | 21  | Discuss the generalisability (external validity) of the study results                                                                                                                                        | 21,22    |
| <b>Other information</b> |     |                                                                                                                                                                                                              |          |
| Funding                  | 22  | Give the source of funding and the role of the funders for the present study and, if applicable, for the original study on which the present article is based                                                | 23       |

\*Give information separately for cases and controls in case-control studies and, if applicable, for exposed and unexposed groups in cohort and cross-sectional studies.

**Note:** An Explanation and Elaboration article discusses each checklist item and gives methodological background and published examples of transparent reporting. The STROBE checklist is best used in conjunction with this article (freely available on the Web sites of PLoS Medicine at <http://www.plosmedicine.org/>, Annals of Internal Medicine at <http://www.annals.org/>, and Epidemiology at <http://www.epidem.com/>). Information on the STROBE Initiative is available at [www.strobe-statement.org](http://www.strobe-statement.org).
